# Supplementary material for: Influence of achiral units with gem-dimethyl substituents on the helical character of aliphatic oligourea foldamers
Source: Royal Society of Chemistry journal article supplement (doi:10.1039/c3cc40961a), 2013-01-01
Supplement: c3cc40961a.pdf [file c3cc40961a.pdf]

## Supporting information

|                                                                                                                                          |            |
|------------------------------------------------------------------------------------------------------------------------------------------|------------|
| <b>Pages S3-S22: Synthesis of oligoureas .....</b>                                                                                       | <b>S3</b>  |
| <b>Scheme S1:</b> Synthesis of activated monomers <b>BB1</b> and <b>BB2</b> .....                                                        | S3         |
| <b>Scheme S2:</b> Activated monomers <b>11a</b> , <b>11b</b> , <b>11c</b> and <b>11d</b> .....                                           | S3         |
| <b>Scheme S3:</b> Synthesis of oligomer <b>2</b> .....                                                                                   | S3         |
| <b>Scheme S4:</b> Synthesis of oligomer <b>3</b> .....                                                                                   | S4         |
| <b>Scheme S5:</b> Synthesis of oligomer <b>4</b> .....                                                                                   | S4         |
| <b>Scheme S6:</b> Synthesis of oligomer <b>5</b> .....                                                                                   | S5         |
| <b>Scheme S7:</b> Synthesis of oligomer <b>6</b> .....                                                                                   | S6         |
| <b>Figure S1:</b> <sup>1</sup> H NMR spectra of carbamate <b>BB1</b> , recording in CDCl <sub>3</sub> , (300MHz).....                    | S17        |
| <b>Figure S2:</b> <sup>13</sup> C NMR spectra of carbamate <b>BB1</b> , recording in CDCl <sub>3</sub> , (75MHz).....                    | S18        |
| <b>Figure S3:</b> <sup>1</sup> H NMR spectra of carbamate <b>BB2</b> , recording in CDCl <sub>3</sub> , (300MHz).....                    | S18        |
| <b>Figure S4:</b> <sup>13</sup> C NMR spectra of compound <b>BB2</b> , recording in CDCl <sub>3</sub> , (75MHz).....                     | S19        |
| <b>Figure S5:</b> <sup>1</sup> H NMR spectra of compound <b>2</b> , recording in CD <sub>3</sub> OH, (400MHz).....                       | S19        |
| <b>Figure S6:</b> <sup>1</sup> H NMR spectra of compound <b>3</b> , recording in CD <sub>3</sub> OH, (400MHz).....                       | S20        |
| <b>Figure S7:</b> <sup>1</sup> H NMR region of methyl protons of DADME residues in a) oligourea <b>2</b> and b) oligourea <b>3</b> ..... | S20        |
| <b>Figure S8:</b> <sup>1</sup> H NMR spectra of compound <b>4</b> recording in CD <sub>3</sub> OH (400MHz).....                          | S21        |
| <b>Figure S9:</b> <sup>1</sup> H NMR spectra of compound <b>5</b> , recording in CD <sub>3</sub> OH, (300MHz).....                       | S21        |
| <b>Figure S10:</b> <sup>1</sup> H NMR spectra of compound <b>6</b> , recording in CD <sub>3</sub> OH, (300MHz).....                      | S22        |
| <b>Pages S23-S32: NMR Characterization.....</b>                                                                                          | <b>S23</b> |
| <b>Scheme S8:</b> Nomenclature used for the description of the various protons for each residue type .....                               | S23        |
| <b>Table S1:</b> <sup>1</sup> H NMR chemical shifts (in ppm) of <b>2</b> in CD <sub>3</sub> OH (400 MHz).....                            | S23        |
| <b>Figure S11:</b> Representative sets of NOE connectivities observed for <b>2</b> in CD <sub>3</sub> OH (400MHz). .....                 | S24        |
| <b>Scheme S9:</b> NOE connectivities observed for <b>2</b> in CD <sub>3</sub> OH. ....                                                   | S25        |
| <b>Table S2:</b> <sup>1</sup> H NMR chemical shifts (in ppm) of <b>3</b> in CD <sub>3</sub> OH (400 MHz).....                            | S25        |

|                                                                                                                                                                |            |
|----------------------------------------------------------------------------------------------------------------------------------------------------------------|------------|
| <b>Figure S12:</b> Representative sets of NOe connectivities observed for <b>3</b> in CD <sub>3</sub> OH (400MHz)..                                            | S26        |
| <b>Scheme S10:</b> NOE connectivities observed for <b>3</b> in CD <sub>3</sub> OH.                                                                             | S27        |
| <b>Table S3:</b> <sup>1</sup> H NMR chemical shifts (in ppm) of <b>4</b> in CD <sub>3</sub> OH (400 MHz)                                                       | S27        |
| <b>Figure S13:</b> Representative sets of NOe connectivities observed for <b>4</b> in CD <sub>3</sub> OH (400MHz).                                             | S28        |
| <b>Table S4:</b> <sup>1</sup> H NMR chemical shifts (in ppm) of <b>5</b> in CD <sub>3</sub> OH (700 MHz)                                                       | S29        |
| <b>Figure S14:</b> Representative sets of NOe connectivities observed for <b>5</b> in CD <sub>3</sub> OH (700MHz).                                             | S30        |
| <b>Table S5:</b> <sup>1</sup> H NMR chemical shifts (in ppm) of <b>6</b> in CD <sub>3</sub> OH (600 MHz)                                                       | S31        |
| <b>Table S6:</b> <sup>1</sup> H NMR anisochronicity ( $\Delta\delta$ ) values for main chain methylene protons in compounds <b>1</b> , <b>2</b> and <b>3</b> . | S31        |
| <b>Table S7:</b> <sup>1</sup> H NMR anisochronicity ( $\Delta\delta$ ) values for main chain methylene protons in compounds <b>4</b> , <b>5</b> and <b>6</b> . | S32        |
| <b>Page S33: Circular dichroism (CD) measurements</b>                                                                                                          | <b>S33</b> |
| <b>Pages S43-S45: X-Ray diffraction studies</b>                                                                                                                | <b>S34</b> |
| <b>Table S8:</b> Crystallographic data for compounds <b>2</b> , <b>3</b> and <b>5</b> .                                                                        | S35        |

## Synthesis of oligoureas

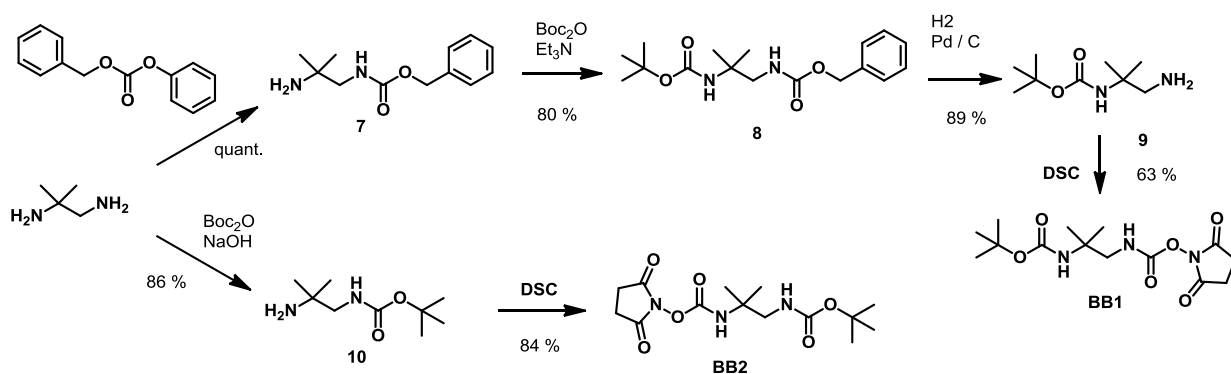

Scheme S1: Synthesis of activated monomers **BB1** and **BB2**

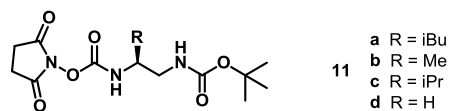

Scheme S2: Activated monomers **11a**, **11b**, **11c** and **11d**

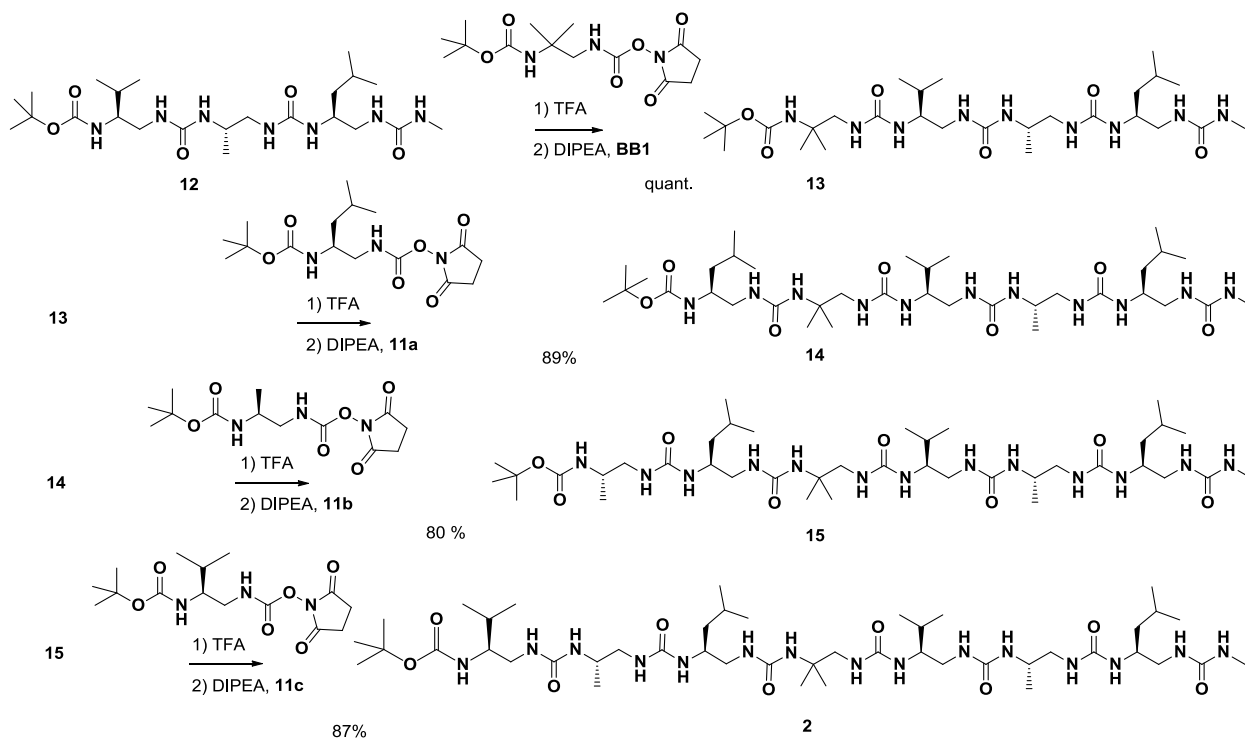

Scheme S3: Synthesis of oligomer **2**

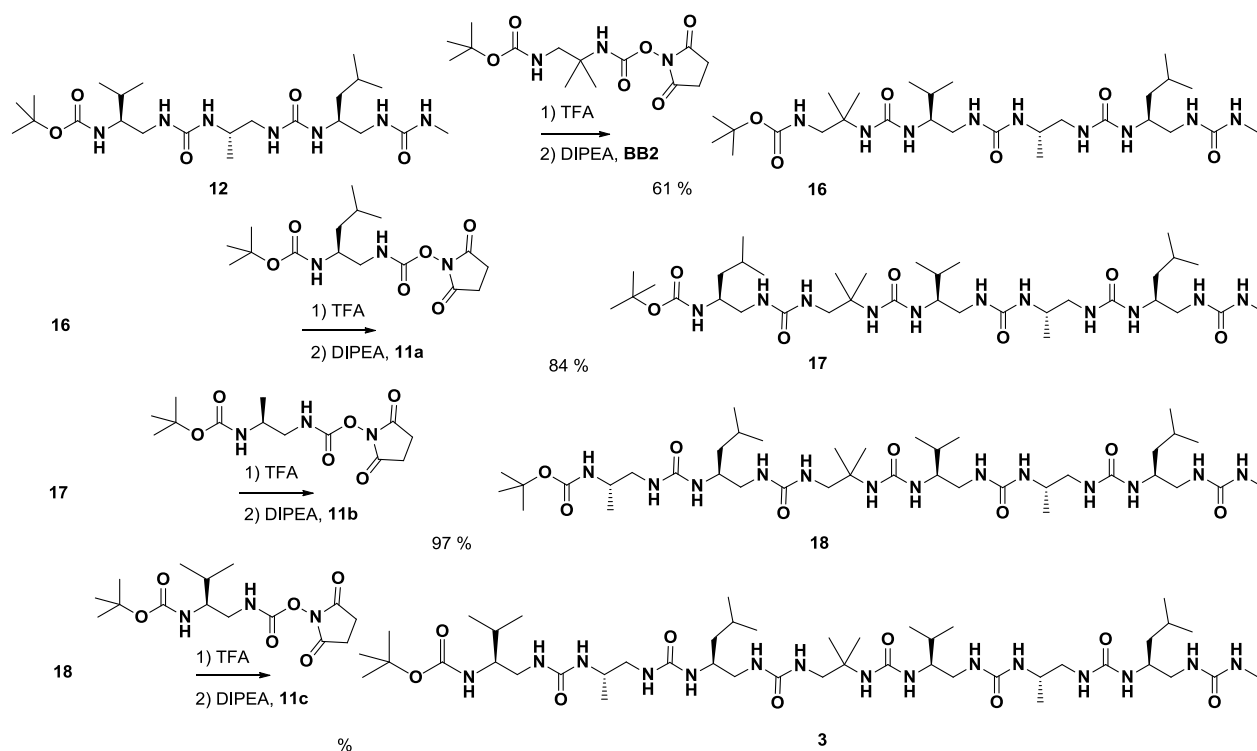

Scheme S4: Synthesis of oligomer 3

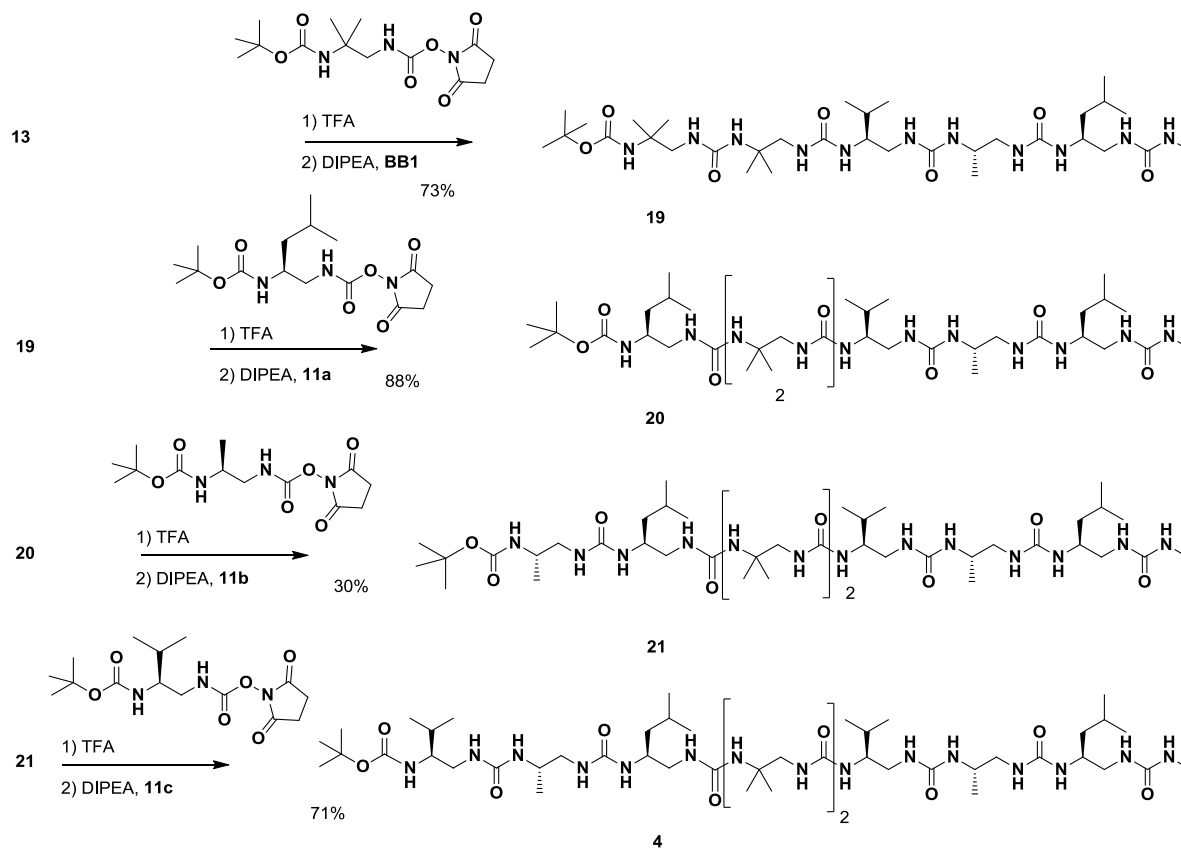

Scheme S5: Synthesis of oligomer 4

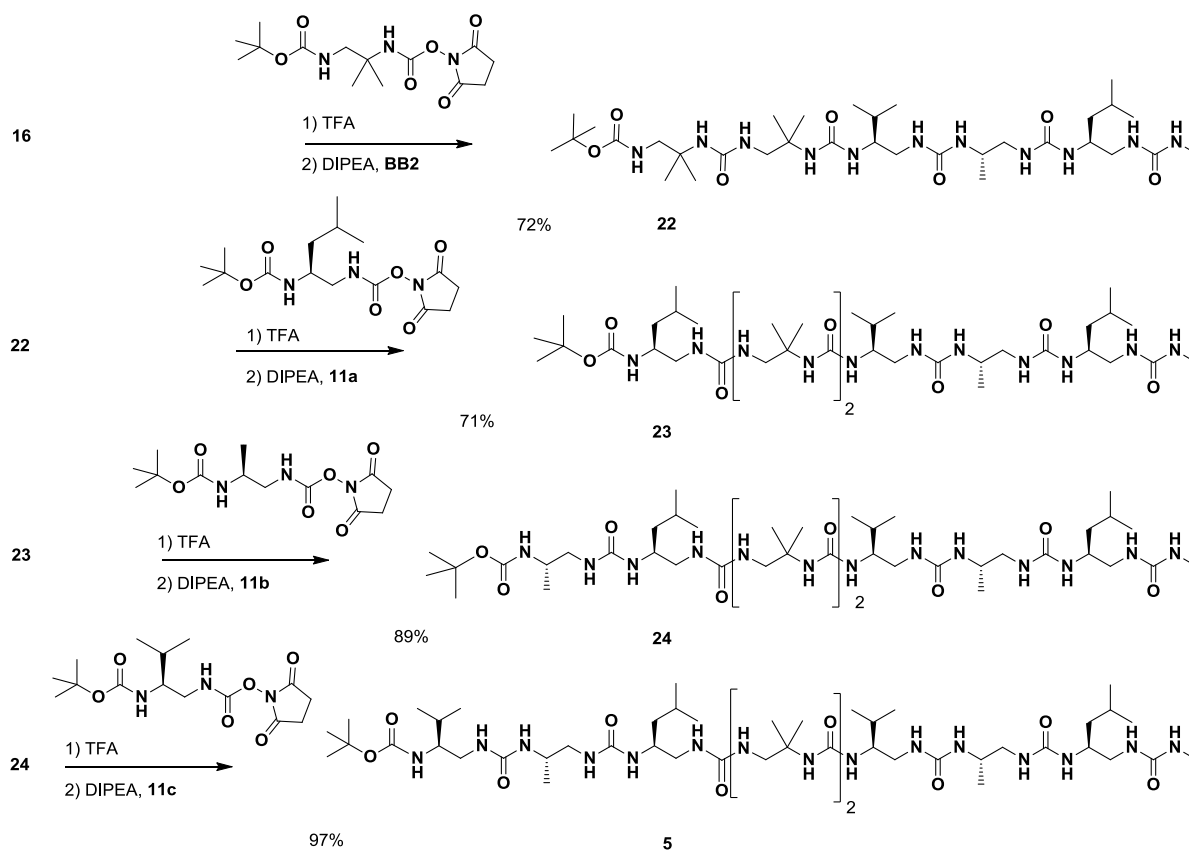

**Scheme S6:** Synthesis of oligomer **5**

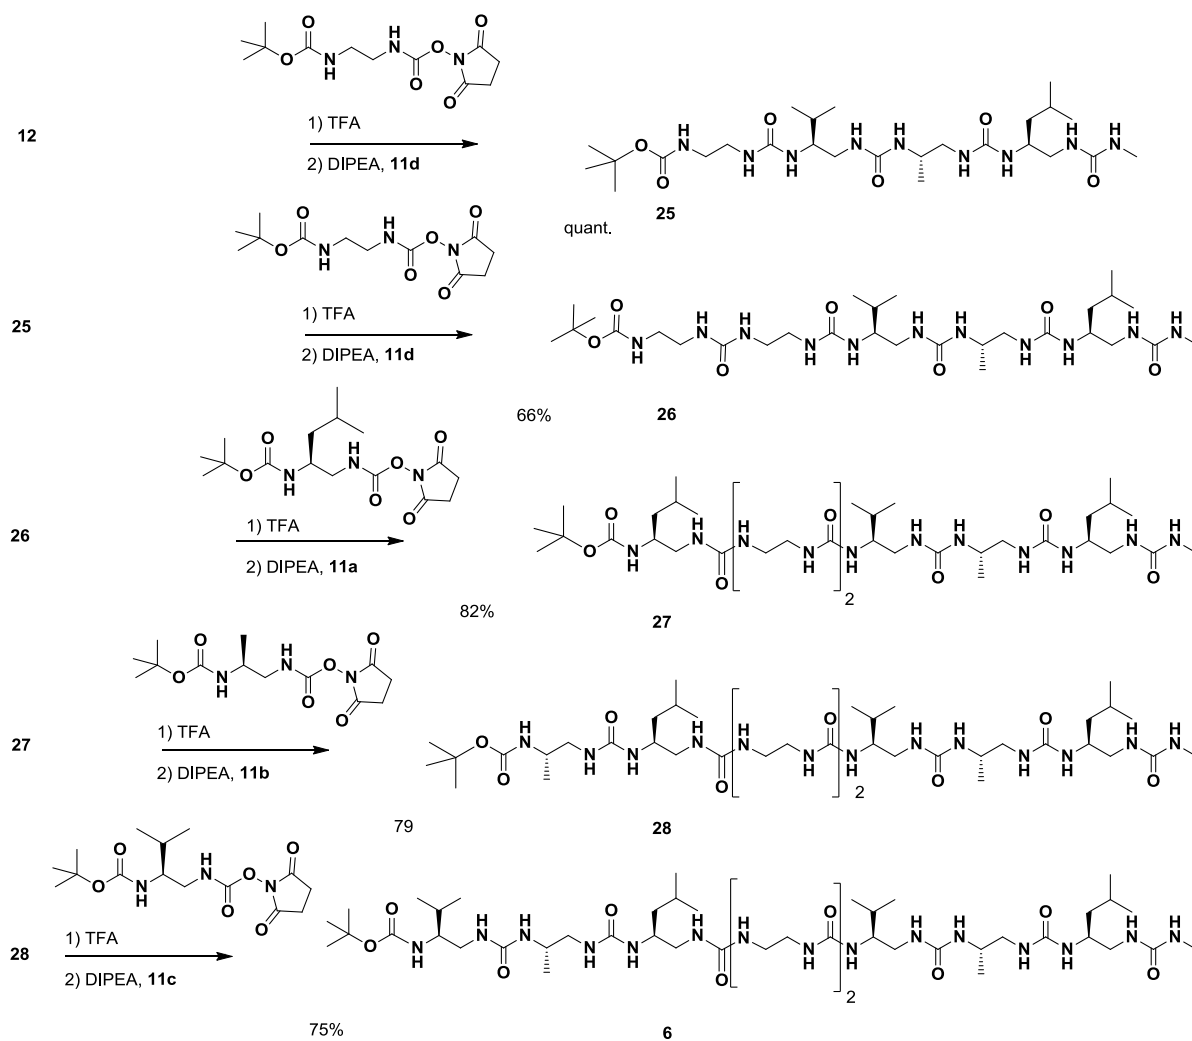

**Scheme S7:** Synthesis of oligomer **6**

**General.** Thin layer chromatography (TLC) was performed on silica gel 60 F254 (Merk) with detection by UV light and charring with 1% w/w ninhydrin in ethanol followed by heating. Flash column chromatography was carried out on silica gel (40-63  $\mu\text{m}$ ).  $^1\text{H}$  NMR and  $^{13}\text{C}$  NMR spectra were recorded on an Avance II NMR spectrometer (Bruker Biospin) with a vertical 7.05T narrow-bore/ultrashield magnet operating at 300 MHz for  $^1\text{H}$  observation and 75 MHz for  $^{13}\text{C}$  observation by means of a 5-mm direct BBO  $^1\text{H}/^{19}\text{F}$ \_XBB\_H probe with Z gradient capabilities. Chemical shifts are reported in parts per million (ppm) relative to the  $^1\text{H}$  residual signal of the deuterated solvent used.  $^1\text{H}$  NMR splitting patterns with observed first-order coupling are designated as singlet (s), doublet (d), triplet (t), or quartet (q). Coupling constants ( $J$ ) are reported in hertz. ESI-MS analyses were carried out on a ThermoElectron LCQ Advantage spectrometer equipped with an ion trap mass analyzer and coupled with a ThermoElectron Surveyor HPLC system.

Compound **7**<sup>1</sup>, activated monomers **11** (**a** R = *i*Bu; **b** R = Me; **c** R = *i*Pr; **d** R = H)<sup>2</sup> and oligomer **1** and **12**<sup>3,4</sup> were prepared using a previously described procedure.

#### (2-Benzyloxycarbonylamino-1,1-dimethyl-ethyl)-carbamic acid *tert*-butyl ester, (**8**)

To a stirred solution of **7** (3 g, 13.5 mmol) in  $\text{CH}_2\text{Cl}_2$  (25 mL), triethylamine (2.3 mL, 16.2 mmol) and di-*tert*-butyl dicarbonate (3.54 g, 16.2 mmol) were successively added and the reaction mixture was allowed to stir at room temperature overnight.  $\text{CH}_2\text{Cl}_2$  was concentrated under reduced pressure and the resulting crude mixture was purified by flash chromatography on silica gel ( $\text{CH}_2\text{Cl}_2$ -MeOH (v/v), 95:5). Compound **7** was obtained as a colorless oil (4.03 g, 92% yield).  $^1\text{H}$  NMR (300 MHz,  $\text{CDCl}_3$ ):  $\delta$  = 1.25 (s, 6H), 1.42 (s, 9H), 3.40 (d,  $J$  = 6.4 Hz, 2H), 4.57 (br s, 1H), 5.11 (s, 2H), 5.36 (br s, 1H), 7.30-7.40 (m, 5H).  $^{13}\text{C}$  NMR (75 MHz,  $\text{CDCl}_3$ ):  $\delta$  = 24.8, 28.1, 49.3, 53.0, 66.4, 78.8, 127.7, 128.1, 136.3, 154.6, 156.8 ESI-MS (MW 322.19):  $m/z$  345.1 [ $\text{M} + \text{Na}$ ]<sup>+</sup>

#### (2-Amino-1,1-dimethyl-ethyl)-carbamic acid *tert*-butyl ester, (**9**)

To a stirred solution of **8** (3.88 g, 12.0 mmol) in EtOH (30 mL) at room temperature, 10% Pd/C (390 mg) was added and the reaction mixture was stirred under  $\text{H}_2$  gas atmosphere for 20 h. The reaction mixture was then filtered over glass microfiber filter, the filtrate was concentrated under reduced pressure and dried under vacuum to afford amine **9** as a colorless oil (2.02 g, 89% yield), which was used for the next step without further purification.  $^1\text{H}$  NMR: (300 MHz,  $\text{CDCl}_3$ ):  $\delta$  = 1.24 (s, 6H), 1.42 (s, 9H), 1.53 (s, 2H), 2.74 (s, 2H), 4.79 (br

<sup>1</sup> M. Pittelkow, R. Lewinsky, J. B. Christensen, *Synthesis* **2002**, 2195-2202.

<sup>2</sup> G. Guichard, V. Semetey, C. Didierjean, A. Aubry, J.-P. Briand, M. Rodriguez, *J. Org. Chem.* **1999**, *64*, 8702.

<sup>3</sup> L. Fischer, P. Claudon, N. Pendem, E. Miclet, C. Didierjean, E. Ennifar, G. Guichard, *Angew. Chem. Int. Ed.* **2010**, *49*, 1067

<sup>4</sup> J. Fremaux, L. Fischer, T. Arbogast, B. Kauffmann, G. Guichard, *Angew. Chem. Int. Ed.* **2011**, *50*, 11382.

s, 1H).  $^{13}\text{C}$  NMR: (75 MHz,  $\text{CDCl}_3$ ):  $\delta$  = 24.6, 28.0, 49.6, 52.4, 78.6, 154.7 ESI-MS (Mw 188.15):  $m/z$  188.9  $[\text{M}+\text{H}]^+$

**(2-tert-Butoxycarbonylamino-2-methyl-propyl)-carbamic acid 2,5-dioxo-pyrrolidin-1-yl ester (BB1)**

To a stirred solution of **9** (1.8 g, 9.6 mmol) in dry  $\text{CH}_2\text{Cl}_2$  (30 mL), a solution of *N,N'*-disuccinimidyl carbonate (2.94 g, 11.5 mmol) in dry  $\text{CH}_2\text{Cl}_2$  (30 mL) was added dropwise and the reaction mixture was stirred at room temperature overnight.  $\text{CH}_2\text{Cl}_2$  was removed under reduced pressure, the residue was dissolved in EtOAc (50 mL) and washed with an aqueous solution of 1M  $\text{KHSO}_4$  ( $3 \times 20$  mL). The organic phase was dried over  $\text{MgSO}_4$ , filtered and concentrated under vacuum to afford compound **BB1** as a white solid (2.1 g, 67% yield).  $^1\text{H}$  NMR: (300 MHz,  $\text{CDCl}_3$ ):  $\delta$  = 1.27 (s, 6H), 1.43 (s, 9H), 2.81 (s, 4H), 3.46 (d,  $J$  = 6.1 Hz, 2H), 4.52 (br s, 1H), 6.50 (br s, 1H).  $^{13}\text{C}$  NMR: (75 MHz,  $\text{CDCl}_3$ ):  $\delta$  = 25.4, 25.6, 28.3, 50.3, 53.0, 79.9, 151.9, 155.2, 169.8 HRMS calcd. for  $\text{C}_{14}\text{H}_{23}\text{N}_3\text{O}_6$  Na 352.1479  $[\text{M}+\text{Na}]^+$ , found 352.1477,  $[2\text{M}+\text{Na}]^+$ , found 681.3060

**(2-Amino-2-methyl-propyl)-carbamic acid tert-butyl ester, (10)**

To a solution of 1,2-diamino-2-methylpropane (1 eq) and sodium hydroxide (0.8 eq) in dioxane/water (1:1 v/v) at  $0^\circ\text{C}$  was added a solution of di-*tert*-butyl dicarbonate (1 eq) in dioxane dropwise. The reaction was stirred at  $0^\circ\text{C}$  for 3.5 h and at room temperature for 2.5 h. The reaction was concentrated under reduced pressure then water added. The product was extracted into  $\text{CH}_2\text{Cl}_2$ , the organic layers combined, dried over  $\text{MgSO}_4$  and the solvent removed under reduced pressure. This afforded **6** as a white solid (77%).  $^1\text{H}$  NMR: (500 MHz,  $\text{CDCl}_3$ )  $\delta$  = 4.95 (br s, 1H, NH), 3.00 (d,  $J$  = 6.3 Hz, 2H,  $\text{CH}_2\text{N}$ ), 1.44 (s, 9H, Boc), 1.12 (br s, 2H,  $\text{NH}_2$ ), 1.08 (s, 6H,  $\text{CH}_3$ ).  $^{13}\text{C}$  NMR (101 MHz,  $\text{CDCl}_3$ )  $\delta$  = 156.5, 79.1, 52.2, 50.1, 28.4, 28.2 ESI-MS (Mw 189.15):  $m/z$  189.16  $[\text{M} + \text{Na}]^+$

**(2-tert-Butoxycarbonylamino-1,1-dimethyl-ethyl)-carbamic acid 2,5-dioxo-pyrrolidin-1-yl ester, (BB2)**

To a suspension of disuccinimidyl carbonate (1.2 eq) in  $\text{CH}_2\text{Cl}_2$  was added **10** (1 eq). The reaction was stirred at room temperature overnight. A small quantity of white solid was removed by filtration. The organic phase was washed with aqueous 1M  $\text{KHSO}_4$  solution and water, dried over  $\text{MgSO}_4$  and the solvent removed under reduced pressure. The residue was re-dissolved in  $\text{CH}_2\text{Cl}_2$  and diethyl ether added. The solid precipitate formed was isolated by filtration and dried under vacuum to afford **BB2** as a white crystalline solid (56%).  $^1\text{H}$  NMR (400 MHz,  $\text{CDCl}_3$ )  $\delta$  = 6.23 (br s, 1H, NH), 4.98 (br s, 1H, NH), 3.26 (d,  $J$  = 6.8 Hz, 2H,  $\text{CH}_2\text{N}$ ), 2.81 (s, 4H,  $\text{CH}_2$ ), 1.46 (s, 9H, Boc), 1.35 (s, 6H,  $\text{CH}_3$ )  $^{13}\text{C}$  NMR (75 MHz,  $\text{CDCl}_3$ )  $\delta$  = 169.96, 157.33, 149.72, 80.23, 77.25, 56.00, 49.37, 28.33, 25.49, 24.06. ESI-MS (Mw



329.16):  $m/z$  347  $[M + Na]^+$  **HRMS** calcd. for  $C_{14}H_{23}N_3O_6 Na$  352.1479  $[M+Na]^+$ , found 352.1475,  $[2M+Na]^+$ , found 681.3057

### General procedure for oligourea coupling.

Boc-protected oligourea (1.0 eq) was dissolved in TFA (3 ml / g) and stirred for 45 min. The reaction mixture was then concentrated under reduced pressure and coevaporated 3 times with cyclohexane. The crude product was then dissolved in  $CH_3CN$  (5 ml / g). DIPEA (3.0 eq) was then added and the mixture was cooled to  $0^\circ C$  prior to the dropwise addition of the desired carbamate, **BB1**, **BB2**, **11a**, **11b**, **11c** or **11d** dissolved in  $CH_3CN$ . The completion of reaction was controlled by TLC.

### Boc-Aib<sup>u</sup>-Val<sup>u</sup>-Ala<sup>u</sup>-Leu<sup>u</sup>-NHMe, (13)

**13** was prepared from **BB1** (125 mg, 0.378 mmol) and **12** (200 mg, 0.398 mmol) as described in the general procedure. After completion (12h), the reaction mixture was evaporated, dissolved in ethyl acetate and treated with saturated  $NaHCO_3$  aqueous solution, 1M  $KHSO_4$  aqueous solution and brine. The organic layer was then dried over  $MgSO_4$  and evaporated. Flash column chromatography ( $CH_2Cl_2$ -MeOH (v/v), 95:5) over silica gel gave **13** as a white product. (>99%)  $^1H$  NMR : (300MHz,  $CD_3OH$ )  $\delta$ = 6.32 (m, 1H, NH), 6.25 (m, 1H, NH), 6.17-5.99 (m, 4H, NH), 5.98-5.79 (m, 3H, NH), 4.03-3.80 (m, 2H, CHN), 3.77-3.63 (m, 1H, CHN), 3.59-3.37 (m, 4H,  $CH_2N$ ), 2.30-2.21 (m, 1H,  $CH_2N$ ), 2.81-2.75 (m, 1H,  $CH_2N$ ), 2.72 (d,  $J$  = 4.7 Hz, 1H,  $CH_3N$ ), 2.60-2.48 (m, 1H,  $CH_2N$ ), 1.77-1.62 (m, 2H, CH), 1.45 (s, 9H, Boc), 1.35-1.28 (m, 2H,  $CH_2$ ), 1.27-1.21 (m, 6H,  $CH_3$ ), 1.06 (d,  $J$  = 6.8 Hz, 3H,  $CH_3$ ), 0.97-0.89 (m, 12H,  $CH_3$ ) **ESI-MS** (Mw 615.81):  $m/z$  616.2  $[M+H]^+$ , 638.3  $[M + Na]^+$ , 1253.0  $[2M+Na]^+$

### Boc-Leu<sup>u</sup>-Aib<sup>u</sup>-Val<sup>u</sup>-Ala<sup>u</sup>-Leu<sup>u</sup>-NHMe, (14)

**14** was prepared from **10a** (55 mg, 0.154 mmol) and **13** (100 mg, 0.162 mmol) as described in the general procedure. After completion (12h), the reaction mixture was evaporated, dissolved in ethyl acetate and treated with saturated  $NaHCO_3$  aqueous solution, 1M  $KHSO_4$  aqueous solution and brine. The organic layer was then dried over  $MgSO_4$  and evaporated. Flash column chromatography ( $CH_2Cl_2$ -MeOH (v/v), 95:5) over silica gel gave **14** as a white product. (116 mg, 89%)  $^1H$  NMR : (300MHz,  $CD_3CN$ )  $\delta$ = 6.16 (m, 1H, NH), 5.98 (m, 1H, NH), 5.83 (m, 2H, NH), 5.65 (m, 1H, NH), 5.59 (m, 1H, NH), 5.52-5.38 (m, 4H, NH), 5.34 (m, 1H, NH), 4.02-3.92 (m, 1H, CHN), 3.86-3.68 (m, 2H, CHN), 3.68-3.49 (m, 7H, CHN- $CH_2N$ ), 3.38-3.27 (1H,  $CH_2N$ ), 2.64 (d,  $J$  = 4.7 Hz, 3H,  $CH_3N$ ), 2.56-2.43 (m, 2H,  $CH_3N$ ), 1.71-1.56 (m, 3H, CH), 1.45 (s, 9H, Boc), 1.35 (s, 3H,  $CH_3$ ), 1.29-1.15 (m, 4H,  $CH_2$ ), 1.13 (s, 3H,  $CH_3$ ), 1.02-0.97 (m, 3H,  $CH_3$ ), 0.94-0.80 (m, 18H,  $CH_3$ ).  $^1H$  NMR : (300MHz,  $CD_3OH$ )  $\delta$ = 6.47 (d,  $J$  = 9.3 Hz, 1H, NH), 6.37 (m, 1H, NH), 6.21-6.12 (m, 2H, NH), 6.09-6.00 (m,

2H, NH), 5.97-5.81 (m, 5H, NH), 4.04-3.93 (m, 1H, CHN), 3.92-.379 (m, 1H, CHN), 3.78-3.62 (m, 2H, CHN), 3.61-3.40 (m, 5H, CH<sub>2</sub>N), 3.28-3.10 (m, 2H, CH<sub>2</sub>N), 2.84-2.75 (m, 1H, CH<sub>2</sub>N), 2.72 (d, J = 4.7 Hz, 3H, CH<sub>3</sub>N), 2.70-2.58 (m, 1H, CH<sub>2</sub>N), 2.55-2.41 (m, 1H, CH<sub>2</sub>N), 1.78-1.57 (m, 3H, CH), 1.48 (s, 9H, CH<sub>3</sub>), 1.31 (s, 3H, CH<sub>3</sub>), 1.28-1.22 (m, 4H, CH<sub>2</sub>), 1.19 (s, 3H, CH<sub>3</sub>), 1.07 (d, J = 6.8 Hz, 3H, CH<sub>3</sub>), 0.97-0.89 (m, 18H, CH<sub>3</sub>). **ESI-MS** (M<sub>w</sub> 758.01): *m/z* 780 [M + Na]<sup>+</sup>

### **Boc-Ala<sup>u</sup>-Leu<sup>u</sup>-Aib<sup>u</sup>-Val<sup>u</sup>-Ala<sup>u</sup>-Leu<sup>u</sup>-NHMe, (15)**

**15** was prepared from **11b** (27 mg, 0.077 mmol) and **14** (50 mg, 0.081 mmol) as described in the general procedure. After completion (12h), the reaction mixture was evaporated, dissolved in ethyl acetate and treated with saturated NaHCO<sub>3</sub> aqueous solution, 1M KHSO<sub>4</sub> aqueous solution and brine. The organic layer was then dried over MgSO<sub>4</sub> and evaporated. Flash column chromatography (CH<sub>2</sub>Cl<sub>2</sub>-MeOH (v/v), 95:5) over silica gel gave **15** as a white product (56 mg, 80%). **<sup>1</sup>H NMR** : (400MHz, CD<sub>3</sub>CN) δ= 6.21 (d, J = 8.0 Hz, 1H, NH), 6.11 (m, 1H, NH), 5.99-5.90 (m, 2H, NH), 5.85-5.77 (m, 2H, NH), 5.66 (m, 1H, NH), 5.62-5.56 (m, 2H, NH), 5.52 (d, J = 9.7 Hz, 1H, NH), 5.48 (d, J = 8.0 Hz, 1H, NH), 5.46 (d, J = 9.4 Hz, 1H, NH), 5.12 (d, J = 9.8 Hz, 1H, NH), 3.95-3.84 (m, 1H, CHN), 3.84-3.67 (m, 3H, CHN), 3.64 (dd, J = 12.0, 2.8 Hz, 1H, CHN), 3.57-3.36 (m, 5H, CH<sub>2</sub>N), 3.29-3.19 (m, 1H, CH<sub>2</sub>N), 2.82-2.74 (m, 1H, CH<sub>2</sub>N), 2.55 (d, J = 4.7 Hz, 3H, CH<sub>3</sub>N), 2.46-2.36 (m, 1H, CH<sub>2</sub>N), 2.34-2.26 (m, 1H, CH<sub>2</sub>N), 2.24-2.15 (m, 1H, CH<sub>2</sub>N), 1.62-1.49 (m, 2H, CH), 1.47-1.37 (m, 1H, CH), 1.36 (s, 9H, Boc), 1.28 (s, 3H, CH<sub>3</sub>), 1.14-1.04 (m, 4H, CH<sub>2</sub>), 0.99 (s, 3H, CH<sub>3</sub>), 0.97 (d, J = 7.0 Hz, 3H, CH<sub>3</sub>), 0.92 (d, J = 6.8 Hz, 3H, CH<sub>3</sub>), 0.83-0.73 (m, 18H, CH<sub>3</sub>). **ESI-MS** (M<sub>w</sub> 857,62): *m/z* 880 [M + Na]<sup>+</sup>

### **Boc-Val<sup>u</sup>-Ala<sup>u</sup>-Leu<sup>u</sup>-Aib<sup>u</sup>-Val<sup>u</sup>-Ala<sup>u</sup>-Leu<sup>u</sup>-NHMe, (2)**

**2** was prepared from **11c** (19 mg, 0.055 mmol) and **15** (50 mg, 0.058 mmol) as described in the general procedure. After completion (12h), the reaction mixture was evaporated, dissolved in ethyl acetate and treated with saturated NaHCO<sub>3</sub> aqueous solution, 1M KHSO<sub>4</sub> aqueous solution and brine. The organic layer was then dried over MgSO<sub>4</sub> and evaporated. Flash column chromatography (CH<sub>2</sub>Cl<sub>2</sub>-MeOH (v/v), 95:5) over silica gel gave **2** as a white product (50mg, 87%). **<sup>1</sup>H NMR** : (400MHz, CD<sub>3</sub>OH) δ= 6.65 (d, J = 10.6 Hz, 1H, NH), 6.53 (dd, J = 10.3, 2.9 Hz, 1H, NH), 6.45 (dd, 1H, NH), 6.37 (s, 1H, NH), 6.34 (dd, J = 9.9, 3.8 Hz, 1H, NH), 6.29 (d, J = 9.9 Hz, 1H, NH), 6.20 (m, 1H, NH), 6.17 (d, J = 10.5 Hz, 1H, NH), 6.03-5.98 (m, 3H, NH), 5.97 (d, J = 11.0 Hz, 1H, NH), 5.90 (dd, J = 8.6, 4.5 Hz, 1H, NH), 5.86 (d, J = 10.3 Hz, 1H, NH), 5.83 (dd, J = 9.9, 3.6 Hz, 1H, NH), 4.10-3.95 (m, 3H, CHN), 3.92-3.79 (m, 1H, CHN), 3.75-3.41 (m, 9H, 2 CHN-7 CH<sub>2</sub>N), 3.19 (dd, J = 12.8, 9.3 Hz, 1H, CH<sub>2</sub>N), 2.70 (d, J = 4.8 Hz, 3H, CH<sub>3</sub>N), 2.67-2.24 (m, 6H, CH<sub>2</sub>N), 1.76-1.57 (m, 4H, CH), 1.48 (s, 9H, Boc), 1.33 (s, 3H, CH<sub>3</sub> (Aib)), 1.31-1.14 (m, 4H, CH<sub>2</sub>), 1.12 (s, 3H, CH<sub>3</sub> (Aib)), 1.07-1.01 (m, 6H, CH<sub>3</sub>), 0.98-0.88 (m, 24H, CH<sub>3</sub>). **<sup>13</sup>C NMR** (400 MHz, CD<sub>3</sub>OH) δ = 162.84, 162.26, 161.13, 160.66, 160.64, 160.00, 159.91, 158.76, 79.39, 56.88, 55.51, 52.52, 47.11,

46.05, 45.72, 45.31, 45.24, 43.94, 43.16, 42.94, 41.95, 31.12, 31.09, 27.85, 26.52, 25.94, 25.28, 25.06, 24.90, 22.79, 22.70, 21.50, 21.21, 19.21, 19.18, 18.10, 17.76, 17.72, 17.47. **ESI-MS** ( $M_w$  985,71):  $m/z$  1009  $[M + Na]^+$

#### **Boc-(Aib<sup>u</sup>)<sub>rev</sub>-Val<sup>u</sup>-Ala<sup>u</sup>-Leu<sup>u</sup>-NHMe, (16)**

**16** was prepared from **BB2** (197 mg, 0.598 mmol) and **12** (300 mg, 0.598 mmol) as described in the general procedure. After completion (12h), the reaction mixture was evaporated, dissolved in ethyl acetate and treated with saturated NaHCO<sub>3</sub> aqueous solution, 1M KHSO<sub>4</sub> aqueous solution and brine. The organic layer was then dried over MgSO<sub>4</sub> and evaporated. Flash column chromatography (CH<sub>2</sub>Cl<sub>2</sub>-MeOH (v/v), 95:5) over silica gel gave **16** as a white product (225 mg, 61%). **<sup>1</sup>H NMR** : (300MHz, CD<sub>3</sub>OH)  $\delta$ = 6.88 (m, 1H, NH), 6.41 (m, 1H, NH), 6.29 (m, 1H, NH), 6.23-6.11 (m, 2H, NH), 5.94 (m, 1H, NH), 5.86-5.75 (m, 2H, NH), 5.63 (d,  $J$  = 9.8 Hz, 1H, NH), 4.10-3.95 (m, 1H, CHN), 3.94-3.83 (m, 1H, CHN), 3.77 (dd,  $J$  = 13.7, 7.9 Hz, 1H, CHN), 3.69-3.45 (m, 4H, CH<sub>2</sub>N), 2.85 (dd,  $J$  = 14.0, 5.3 Hz, 1H, CH<sub>2</sub>N), 2.73 (d,  $J$  = 4.6 Hz, 3H, CH<sub>3</sub>N), 2.70-2.63 (m, 1H, CH<sub>2</sub>N), 2.56-2.34 (m, 2H, CH<sub>2</sub>N), 1.78-1.56 (m, 2H, CH), 1.49 (s, 9H, Boc), 1.38 (s, 3H, CH<sub>3</sub>(Aib)), 1.32-1.20 (m, 2H, CH<sub>2</sub>), 1.16 (s, 3H, CH<sub>3</sub>(Aib)), 1.06 (d,  $J$  = 6.8 Hz, 2H, CH<sub>3</sub>), 0.97-0.86 (m, 12H, CH<sub>3</sub>) **ESI-MS** ( $M_w$  615.81):  $m/z$  616.2  $[M + H]^+$ , 639.3  $[M + Na]^+$ , 1230.8  $[2M + H]^+$ , 1256.0  $[2M + Na]^+$

#### **Boc-Leu<sup>u</sup>-(Aib<sup>u</sup>)<sub>rev</sub>-Val<sup>u</sup>-Ala<sup>u</sup>-Leu<sup>u</sup>-NHMe, (17)**

**17** was prepared **11a** (34 mg, 0.097 mmol) and **16** (60 mg, 0.097 mmol) as described in the general procedure. After completion (12h), the reaction mixture was evaporated, dissolved in ethyl acetate and treated with saturated NaHCO<sub>3</sub> aqueous solution, 1M KHSO<sub>4</sub> aqueous solution and brine. The organic layer was then dried over MgSO<sub>4</sub> and evaporated. Flash column chromatography (CH<sub>2</sub>Cl<sub>2</sub>-MeOH (v/v), 95:5) over silica gel gave **16** as a white product (62 mg, 84%). **<sup>1</sup>H NMR** : (300MHz, CD<sub>3</sub>OH)  $\delta$ = 6.51 (d,  $J$  = 9.4 Hz, 1H, NH), 6.47-6.38 (m, 2H, NH), 6.31-6.10 (m, 5H, NH), 5.96 (d,  $J$  = 9.9 Hz, 1H, NH), 5.76 (d,  $J$  = 10.0 Hz, 1H, NH), 5.42 (s, 1H, NH), 4.05-3.78 (m, 3H, CHN), 3.79-3.66 (m, 2H, CHN), 3.64-3.49 (m, 4H, CH<sub>2</sub>N), 3.42-3.35 (m, 1H, CH<sub>2</sub>N), 3.28-3.16 (m, 1H, CH<sub>2</sub>N), 2.71 (d,  $J$  = 4.0 Hz, 3H, CH<sub>3</sub>N), 2.68-2.57 (m, 2H, CH<sub>2</sub>N), 2.56-2.45 (m, 1H, CH<sub>2</sub>N), 2.43-2.31 (m, 1H, CH<sub>2</sub>N), 1.75-1.50 (m, 3H, CH), 1.45 (s, 9H, CH<sub>3</sub>), 1.42 (s, 3H, CH<sub>3</sub>), 1.35-1.17 (m, 4H, CH<sub>2</sub>), 1.047 (s, 3H, CH<sub>3</sub>), 1.04 (d,  $J$  = 6.8 Hz, 3H, CH<sub>3</sub>), 0.95-0.83 (m, 18H, CH<sub>3</sub>). **ESI-MS** ( $M_w$  758.01):  $m/z$  758.3  $[M + H]^+$ , 781.4  $[M + Na]^+$ , 1514.9  $[2M + H]^+$ , 1538.9  $[2M + Na]^+$

#### **Boc-Ala<sup>u</sup>-Leu<sup>u</sup>-(Aib<sup>u</sup>)<sub>rev</sub>-Val<sup>u</sup>-Ala<sup>u</sup>-Leu<sup>u</sup>-NHMe, (18)**

**18** was prepared from **11b** (24 mg, 0.077 mmol) and **17** (62 mg, 0.081 mmol) as described in the general procedure. After completion (12h), the reaction mixture was evaporated, dissolved in ethyl acetate and treated with saturated NaHCO<sub>3</sub> aqueous solution, 1M KHSO<sub>4</sub> aqueous

solution and brine. The organic layer was then dried over MgSO<sub>4</sub> and evaporated. Flash column chromatography (CH<sub>2</sub>Cl<sub>2</sub>-MeOH (v/v), 95:5) over silica gel gave **18** as a white product (84 mg, 97%). <sup>1</sup>H NMR : (400MHz, CD<sub>3</sub>OH) δ = 6.59 (d, J = 8.8 Hz, 1H, NH), 6.51-6.41 (m, 2H, NH), 6.36-6.28 (m, 2H, NH), 6.27-6.10 (m, 3H, NH), 6.07 (d, J = 10.1 Hz, 1H, NH), 6.00 (t, J = 6.1 Hz, 1H, NH), 5.89 (d, J = 10.0 Hz, 1H, NH), 5.83 (d, J = 9.5 Hz, 1H, NH), 5.75 (s, 1H, NH), 4.07-3.94 (m, 2H, CHN), 3.94-3.78 (m, 4H, CHN), 3.71-3.46 (m, 8H, CH<sub>2</sub>N), 2.91-2.77 (m, 1H, CH<sub>2</sub>N), 2.74 (d, J = 4.7 Hz, 3H, CH<sub>3</sub>N), 2.71-2.33 (m, 5H, CH<sub>2</sub>N), 1.80-1.62 (m, 4H, CH), 1.47 (s, 9H, Boc), 1.46 (s, 3H, CH<sub>3</sub>), 1.32-1.21 (m, 4H, CH<sub>2</sub>), 1.14 (s, 3H, CH<sub>3</sub>), 1.12-1.03 (m, 6H, CH<sub>3</sub>), 0.99-0.87 (m, 24H, CH<sub>3</sub>)

### **Boc-Val<sup>u</sup>-Ala<sup>u</sup>-Leu<sup>u</sup>-(Aib<sup>u</sup>)<sub>rev</sub>-Val<sup>u</sup>-Ala<sup>u</sup>-Leu<sup>u</sup>-NHMe, (3)**

**3** was prepared from **11c** (32 mg, 0.093 mmol) and **18** (84 mg, 0.097 mmol) as described in the general procedure. After completion (12h), the reaction mixture was evaporated, dissolved in ethyl acetate and treated with saturated NaHCO<sub>3</sub> aqueous solution, 1M KHSO<sub>4</sub> aqueous solution and brine. The organic layer was then dried over MgSO<sub>4</sub> and evaporated. Flash column chromatography (CH<sub>2</sub>Cl<sub>2</sub>-MeOH (v/v), 90:10) over silica gel gave **3** as a white product (75 mg, 78%). <sup>1</sup>H NMR : (400MHz, CD<sub>3</sub>OH) δ = 6.71 (m, 1H, NH), 6.61 (d, J = 10.4 Hz, 1H, NH), 6.53-6.45 (m, 2H, NH), 6.37-6.20 (m, 4H, NH), 6.05 (d, J = 10.3 Hz, 1H, NH), 6.02-5.97 (m, 2H, NH), 5.95 (d, J = 10.7 Hz, 1H, NH), 5.88 (d, J = 9.8 Hz, 1H, NH), 5.77 (m, 1H, NH), 5.68 (s, 1H, NH), 4.18-3.97 (m, 2H, CHN), 3.93-3.81 (m, 2H, CHN), 3.70-3.46 (m, 9H, CH<sub>2</sub>N), 2.72 (d, J = 4.6 Hz, 3H, NH), 2.69-2.53 (m, 2H, CH<sub>2</sub>N), 2.55-2.31 (m, 1H, CH<sub>2</sub>N), 1.76-1.52 (m, 4H, CH), 1.49 (s, 9H, CH<sub>3</sub>), 1.27-1.17 (m, 4H, CH<sub>2</sub>), 1.14 (m, 3H, CH<sub>3</sub>), 1.08-1.01 (m, 6H, CH<sub>3</sub>), 0.99-0.82 (m, 24H, CH<sub>3</sub>). <sup>13</sup>C NMR (400 MHz, CD<sub>3</sub>OH) δ 161.23, 161.12, 160.67, 160.48, 160.38, 159.97, 159.89, 158.68, 79.31, 56.65, 54.85, 53.40, 46.29, 45.60, 45.38, 45.32, 43.73, 43.16, 42.85, 42.32, 31.23, 31.06, 27.86, 26.23, 25.94, 25.29, 24.95, 24.88, 22.78, 22.73, 21.86, 21.52, 19.14, 19.12, 18.01, 17.62, 17.43. **ESI-MS** (Mw 985,71): *m/z* 1008.7 [M + Na]<sup>+</sup>

### **Boc-Aib<sup>u</sup>-Aib<sup>u</sup>-Val<sup>u</sup>-Ala<sup>u</sup>-Leu<sup>u</sup>-NHMe, (19)**

**19** was prepared from **BB1** (50 mg, 0.154 mmol) and **13** (100 mg, 0.162 mmol) as described in the general procedure. After completion (12h), the reaction mixture was evaporated, dissolved in ethyl acetate and treated with saturated NaHCO<sub>3</sub> aqueous solution, 1M KHSO<sub>4</sub> aqueous solution and brine. The organic layer was then dried over MgSO<sub>4</sub> and evaporated. Flash column chromatography (CH<sub>2</sub>Cl<sub>2</sub>-MeOH (v/v), 95:5) over silica gel gave **19** as a white product (90 mg, 73%). <sup>1</sup>H NMR : (300MHz, DMSO *d*<sub>6</sub>) δ = 6.46 (s, 1H, NH), 6.10 (m, 1H, NH), 6.02-5.86 (m, 8H, NH), 5.82 (m, 1H, NH), 3.75-3.65 (m, 1H, CHN), 3.64-3.57 (m, 1H, CHN), 3.57-3.46 (m, 1H, CHN), 3.28-3.15 (m, 6H, CH<sub>2</sub>N), 3.09-3.04 (m, 2H, CH<sub>2</sub>N), 2.71-2.60 (m, 2H, CH<sub>2</sub>N), 2.54 (d, J = 4.5 Hz, 3H, CH<sub>3</sub>N), 1.67-1.54 (m, 2H, CH), 1.36 (s, 9H, Boc), 1.21-1.15 (m, 2H, CH<sub>2</sub>), 1.17-1.07 (m, 12H, CH<sub>3</sub>), 0.93 (d, J = 6.6 Hz, 3H, CH<sub>3</sub>), 0.88-0.75 (m, 12H, CH<sub>3</sub>). **ESI-MS** (Mw 729,95): *m/z* 752 [M + Na]<sup>+</sup>

### **Boc-Leu<sup>u</sup>-Aib<sup>u</sup>-Aib<sup>u</sup>-Val<sup>u</sup>-Ala<sup>u</sup>-Leu<sup>u</sup>-NHMe, (20)**

**20** was prepared from **11a** (27 mg, 0.078 mmol) and **19** (60 mg, 0.082 mmol) as described in the general procedure. After completion (12h), the reaction mixture was evaporated, dissolved in ethyl acetate and treated with saturated NaHCO<sub>3</sub> aqueous solution, 1M KHSO<sub>4</sub> aqueous solution and brine. The organic layer was then dried over MgSO<sub>4</sub> and evaporated. Flash column chromatography (CH<sub>2</sub>Cl<sub>2</sub>-MeOH (v/v), 95:5) over silica gel gave **20** as a white product (63 mg, 88%). <sup>1</sup>H NMR : (400MHz, CD<sub>3</sub>CN) δ= 6.05 (m, 1H, NH), 5.86-5.78 (m, 2H, NH), 5.74-5.54 (m, 4H, NH), 5.52-5.38 (m, 5H, NH), 5.33 (m, 1H, NH), 3.97-3.87 (m, 1H, CHN), 3.85-3.74 (m, 1H, CHN), 3.69-3.50 (m, 5H, CHN-CH<sub>2</sub>N), 3.46-3.34 (m, 1H, CH<sub>2</sub>N), 3.27-2.98 (m, 2H, CH<sub>2</sub>N), 2.65 (d, J = 4.7 Hz, 3H, CH<sub>3</sub>N), 2.59-2.48 (m, 1H, CH<sub>2</sub>N), 1.70-1.56 (m, 3H, CH), 1.43 (s, 9H, Boc), 1.36-1.14 (m, 16H, CH<sub>2</sub>-CH<sub>3</sub>), 1.01 (d, J = 6.8 Hz, 3H, CH<sub>3</sub>), 0.94-0.85 (m, 18H, CH<sub>3</sub>). ESI-MS (Mw 872,15): *m/z* 894 [M + Na]<sup>+</sup>

### **Boc-Ala<sup>u</sup>-Leu<sup>u</sup>-Aib<sup>u</sup>-Aib<sup>u</sup>-Val<sup>u</sup>-Ala<sup>u</sup>-Leu<sup>u</sup>-NHMe, (21)**

**21** was prepared **11b** (10 mg, 0.032 mmol) and **20** (30 mg, 0.034 mmol) as described in the general procedure. After completion (12h), the reaction mixture was evaporated, dissolved in ethyl acetate and treated with saturated NaHCO<sub>3</sub> aqueous solution, 1M KHSO<sub>4</sub> aqueous solution and brine. The organic layer was then dried over MgSO<sub>4</sub> and evaporated. Flash column chromatography (CH<sub>2</sub>Cl<sub>2</sub>-MeOH (v/v), 95:5) over silica gel gave **21** as a white product (10 mg, 30%). <sup>1</sup>H NMR : (400MHz, CD<sub>3</sub>CN) δ= 6.13 (m, 1H, NH), 6.02 (m, 1H, NH), 5.96 (m, 1H, NH), 5.87 (m, 1H, NH), 5.83-5.65 (m, 4H, NH), 5.63-5.47 (m, 1H, NH), 5.37 (m, 1H, NH), 5.23 (m, 1H, NH), 4.99 (m, 1H, NH), 3.99-3.75 (m, 4H, CHN), 3.71-3.33 (m, 10H, CHN-CH<sub>2</sub>N), 3.15-3.01 (m, 2H, CH<sub>2</sub>N), 2.65 (s, 3H, CH<sub>3</sub>N), 2.63-2.42 (m, 2H, CH<sub>2</sub>N), 1.73-1.55 (m, 3H, CH), 1.47 (s, 9H, Boc), 1.35-1.27 (m, 6H, CH<sub>3</sub>), 1.26-1.17 (m, 4H, CH<sub>2</sub>), 1.16-1.07 (m, 6H, CH<sub>3</sub>), 1.06-0.97 (m, 6H, CH<sub>3</sub>), 0.96-0.84 (m, 18H, CH<sub>3</sub>). ESI-MS (Mw 972,27): *m/z* 994 [M + Na]<sup>+</sup>

### **Boc-Val<sup>u</sup>-Ala<sup>u</sup>-Leu<sup>u</sup>-Aib<sup>u</sup>-Aib<sup>u</sup>-Val<sup>u</sup>-Ala<sup>u</sup>-Leu<sup>u</sup>-NHMe, (4)**

**4** was prepared from **11c** (3 mg, 0.009 mmol) and **21** (10 mg, 0.010 mmol) as described in the general procedure. After completion (12h), the reaction mixture was evaporated, dissolved in ethyl acetate and treated with saturated NaHCO<sub>3</sub> aqueous solution, 1M KHSO<sub>4</sub> aqueous solution and brine. The organic layer was then dried over MgSO<sub>4</sub> and evaporated. Flash column chromatography (CH<sub>2</sub>Cl<sub>2</sub>-MeOH (v/v), 95:5) over silica gel gave **4** as a white product (8 mg, 71%). <sup>1</sup>H NMR : (400MHz, CD<sub>3</sub>OH) δ= 6.57 (d, J = 11.6 Hz, 1H, NH), 6.39 (m, 1H, NH), 6.28 (m, 1H, NH), 6.25-6.17 (m, 2H, NH), 6.15-6.02 (m, 5H, NH), 5.93 (m, 1H, NH), 5.86-5.68 (m, 6H, NH), 3.97-3.83 (m, 3H, CHN), 3.76 (m, 1H, CHN), 3.65-3.32 (m, 10H, CHN-CH<sub>2</sub>N), 3.23-3.08 (m, 2H, CH<sub>2</sub>N), 2.61 (d, J = 4.5 Hz, 3H, CH<sub>3</sub>), 2.59-2.03 (m, 6H, CH<sub>2</sub>N), 1.67-1.46 (m, 4H, CH), 1.37 (s, 9H, Boc), 1.21 (s, 3H, CH<sub>3</sub>), 1.19 (s, 6H, CH<sub>3</sub>), 1.11

(s, 3H, CH<sub>3</sub>), 0.99-0.91 (m, 6H, CH<sub>3</sub>), 0.88-0.76 (m, 24H, CH<sub>3</sub>). **ESI-MS** (M<sub>w</sub> 1099,79): *m/z* 573 [M/2 + Na]<sup>+</sup>, 1122 [M + Na]<sup>+</sup>

#### **Boc-(Aib<sup>u</sup>)<sub>rev</sub>-(Aib<sup>u</sup>)<sub>rev</sub>-Val<sup>u</sup>-Ala<sup>u</sup>-Leu<sup>u</sup>-NHMe, (22)**

**22** was prepared from **BB2** (63 mg, 0.193 mmol) and **16** (125 mg, 0.203 mmol) as described in the general procedure. After completion (12h), the reaction mixture was evaporated, dissolved in ethyl acetate and treated with saturated NaHCO<sub>3</sub> aqueous solution, 1M KHSO<sub>4</sub> aqueous solution and brine. The organic layer was then dried over MgSO<sub>4</sub> and evaporated. Flash column chromatography (CH<sub>2</sub>Cl<sub>2</sub>-MeOH (v/v), 90:10) over silica gel gave **22** as a white product (110 mg, 72 %). **<sup>1</sup>H NMR** : (300MHz, CD<sub>3</sub>OH) δ = 6.74 (m, 1H, NH), 6.58-6.45 (m, 2H, NH), 6.33 (m, 1H, NH), 6.27-6.19 (m, 2H, NH), 6.07-5.98 (m, 2H, NH), 5.88 (s, 1H, NH), 5.72 (d, J = 10.0 Hz, 1H, NH), 5.65 (s, 1H, NH), 4.09-3.95 (m, 1H, CHN), 3.94-3.81 (m, 2H, CHN), 3.68-3.49 (m, 4H, CH<sub>2</sub>N), 3.36-3.32 (m, 2H, CH<sub>2</sub>N), 3.09-3.00 (m, 1H, CH<sub>2</sub>N), 2.74 (d, J = 3.8 Hz, 3H, CH<sub>3</sub>N), 2.73-2.62 (m, 1H, CH<sub>2</sub>N), 2.59-2.39 (m, 2H, CH<sub>2</sub>N), 1.79-1.55 (m, 2H, CH), 1.48 (s, 9H, CH<sub>3</sub>), 1.42 (s, 3H, CH<sub>3</sub>), 1.33 (s, 3H, CH<sub>3</sub>), 1.29-1.23 (m, 2H, CH<sub>2</sub>), 1.22 (s, 3H, CH<sub>3</sub>), 1.11 (s, 3H, CH<sub>3</sub>), 1.06 (d, J = 6.8 Hz, 3H, CH<sub>3</sub>), 0.97-0.87 (m, 12H, CH<sub>3</sub>). **ESI-MS** (M<sub>w</sub> 729.95): *m/z* 730.3 [M + H]<sup>+</sup>, 753.4 [M + Na]<sup>+</sup>, 1459.9 [2M + H]<sup>+</sup>, 1484.1 [2M + Na]<sup>+</sup>

#### **Boc-Leu<sup>u</sup>-(Aib<sup>u</sup>)<sub>rev</sub>-(Aib<sup>u</sup>)<sub>rev</sub>-Val<sup>u</sup>-Ala<sup>u</sup>-Leu<sup>u</sup>-NHMe, (23)**

**23** was prepared from **11a** (51 mg, 0.144 mmol) and **22** (100 mg, 0.137 mmol) as described in the general procedure. After completion (12h), the reaction mixture was evaporated, dissolved in ethyl acetate and treated with saturated NaHCO<sub>3</sub> aqueous solution, 1M KHSO<sub>4</sub> aqueous solution and brine. The organic layer was then dried over MgSO<sub>4</sub> and evaporated. Flash column chromatography (CH<sub>2</sub>Cl<sub>2</sub>-MeOH (v/v), 90:10) over silica gel gave **23** as a white product (85 mg, 71 %). **<sup>1</sup>H NMR** : (300MHz, CD<sub>3</sub>OH) δ = 6.49 (m, 1H, NH), 6.40 (m, 2H, NH), 6.33 (m, 1H, NH), 6.27-6.16 (m, 3H, NH), 6.13-6.02 (m, 3H, NH), 5.90-5.83 (m, 2H, NH), 5.79 (d, J = 10.0 Hz, 1H, NH), 4.05-3.94 (m, 1H, CHN), 3.94-3.80 (m, 2H, CHN), 3.76-3.66 (m, 1H, CHN), 6.65-3.48 (m, 5H, CH<sub>2</sub>N), 3.33-3.21 (m, 1H, CH<sub>2</sub>N), 3.07-2.96 (m, 2H, CH<sub>2</sub>N), 2.74 (d, J = 3.8 Hz, 3H, CH<sub>3</sub>N), 2.72-2.65 (m, 2H, CH<sub>2</sub>N), 2.59-2.37 (m, 2H, CH<sub>2</sub>N), 1.77-1.56 (m, 3H, CH), 1.47 (s, 9H, CH<sub>3</sub>), 1.42 (s, 3H, CH<sub>3</sub>), 1.34 (s, 3H, CH<sub>3</sub>), 1.31-1.25 (m, 4H, CH<sub>2</sub>), 1.23 (s, 3H, CH<sub>3</sub>), 1.13 (s, 3H, CH<sub>3</sub>), 1.06 (d, J = 6.8 Hz, 3H, CH<sub>3</sub>), 0.99-0.88 (m, 18H, CH<sub>3</sub>).

#### **Boc-Ala<sup>u</sup>-Leu<sup>u</sup>-(Aib<sup>u</sup>)<sub>rev</sub>-(Aib<sup>u</sup>)<sub>rev</sub>-Val<sup>u</sup>-Ala<sup>u</sup>-Leu<sup>u</sup>-NHMe, (24)**

**24** was prepared from **11b** (30 mg, 0.096 mmol) and **23** (80 mg, 0.091 mmol) as described in the general procedure. After completion (12h), the reaction mixture was evaporated, dissolved in ethyl acetate and treated with saturated NaHCO<sub>3</sub> aqueous solution, 1M KHSO<sub>4</sub> aqueous solution and brine. The organic layer was then dried over MgSO<sub>4</sub> and evaporated. Flash column chromatography (CH<sub>2</sub>Cl<sub>2</sub>-MeOH (v/v), 90:10) over silica gel gave **24** as a white



product (80 mg, 89 %).  $^1\text{H NMR}$  : (300MHz,  $\text{CD}_3\text{OH}$ )  $\delta$  = 6.60 (d,  $J$  = 9.1 Hz, 1H, NH), 6.53 (m, 1H, NH), 6.50-6.41 (m, 2H, NH), 6.36 (m, 1H, NH), 6.29 (d,  $J$  = 9.1 Hz, 1H, NH), 6.26-6.19 (m, 2H, NH), 6.16-6.00 (m, 3H, NH), 5.95 (s, 1H, NH), 5.88 (s, 1H, NH), 5.83 (m, 2H, NH), 4.07-3.79 (m, 4H, CHN), 3.78-3.65 (m, 1H, CHN), 3.64-6.40 (m, 5H,  $\text{CH}_2\text{N}$ ), 3.33-3.21 (m, 2H,  $\text{CH}_2\text{N}$ ), 2.97-2.84 (m, 1H,  $\text{CH}_2\text{N}$ ), 2.83-2.76 (m, 1H,  $\text{CH}_2\text{N}$ ), 2.75 (d,  $J$  = 3.9 Hz, 3H,  $\text{CH}_3\text{N}$ ), 2.71-2.40 (m, 4H,  $\text{CH}_2\text{N}$ ), 1.79-1.54 (m, 3H, CH), 1.47 (s, 9H,  $\text{CH}_3$ ), 1.43 (s, 3H,  $\text{CH}_3$ ), 1.39 (s, 3H,  $\text{CH}_3$ ), 1.35-1.25 (m, 4H,  $\text{CH}_2$ ), 1.23 (s, 3H,  $\text{CH}_3$ ), 1.12 (s, 3H,  $\text{CH}_3$ ), 1.09-1.04 (m, 6H,  $\text{CH}_3$ ), 0.98-0.88 (m, 18H,  $\text{CH}_3$ ). **ESI-MS** ( $M_w$  972.27):  $m/z$  973.4 [ $M + \text{H}$ ] $^+$ , 995.5 [ $M + \text{Na}$ ] $^+$ , 1102.0 [ $M + \text{K}$ ] $^+$

### **Boc-Val<sup>u</sup>-Ala<sup>u</sup>-Leu<sup>u</sup>-(Aib<sup>u</sup>)<sub>rev</sub>- (Aib<sup>u</sup>)<sub>rev</sub>-Val<sup>u</sup>-Ala<sup>u</sup>-Leu<sup>u</sup>-NHMe, (5)**

**5** was prepared from **11c** (29 mg, 0.086 mmol) and **24** (80 mg, 0.082 mmol) as described in the general procedure. After completion (12h), the reaction mixture was evaporated, dissolved in ethyl acetate and treated with saturated  $\text{NaHCO}_3$  aqueous solution, 1M  $\text{KHSO}_4$  aqueous solution and brine. The organic layer was then dried over  $\text{MgSO}_4$  and evaporated. Flash column chromatography ( $\text{CH}_2\text{Cl}_2$ -MeOH (v/v), 90:10) over silica gel gave **5** as a white product (88 mg, 97 %).  $^1\text{H NMR}$  : (300MHz,  $\text{CD}_3\text{OH}$ )  $\delta$  = 6.66 (m, 1H, NH), 6.61 (d,  $J$  = 10.1 Hz, 1H, NH), 6.57-6.51 (m, 2H, NH), 6.50-6.43 (m, 2H, NH), 6.35 (m, 1H, NH), 6.30 (d,  $J$  = 9.1 Hz, 1H, NH), 6.24 (m, 1H, NH), 6.15 (d,  $J$  = 10.0 Hz, 1H, NH), 6.01-5.93 (m, 2H, NH), 5.92-5.92 (m, 2H, NH), 5.88 (m, 1H, NH), 5.85 (m, NH), 5.82 (m, 1H, NH), 4.17-3.82 (m, 4H, CHN), 3.81-3.71 (m, 1H, CHN), 3.70-3.46 (m, 9H, CHN- $\text{CH}_2\text{N}$ ), 2.91-2.82 (m, 1H,  $\text{CH}_2\text{N}$ ), 2.79-2.69 (m, 1H,  $\text{CH}_2\text{N}$ ), 2.75 (d,  $J$  = 3.8 Hz, 3H,  $\text{CH}_3\text{N}$ ), 2.68-2.42 (m, 5H,  $\text{CH}_2\text{N}$ ), 2.42-2.29 (m, 1H,  $\text{CH}_2\text{N}$ ), 1.79-1.56 (m, 4H, CH), 1.50 (s, 9H,  $\text{CH}_3$ ), 1.43 (s, 3H,  $\text{CH}_3$ ), 1.39 (s, 3H,  $\text{CH}_3$ ), 1.31-1.25 (m, 4H,  $\text{CH}_2$ ), 1.24 (s, 3H,  $\text{CH}_3$ ), 1.12 (s, 3H,  $\text{CH}_3$ ), 1.08-1.01 (m, 6H,  $\text{CH}_3$ ), 0.98-0.88 (m, 24H,  $\text{CH}_3$ ).  $^{13}\text{C NMR}$  (300 MHz,  $\text{CD}_3\text{OH}$ )  $\delta$  160.68, 160.64, 160.21, 160.02, 159.66, 159.45, 159.20, 158.32, 78.93, 56.23, 56.13, 54.56, 54.46, 52.99, 52.89, 52.54, 52.45, 46.62, 46.34, 45.49, 45.25, 44.96, 44.78, 43.15, 42.82, 42.72, 42.29, 42.18, 30.68, 30.42, 27.50, 25.98, 25.93, 25.63, 25.50, 25.07, 24.72, 24.57, 24.48, 24.44, 22.39, 21.14, 21.12, 18.85, 18.78, 17.60, 17.50, 17.28, 17.18. **ESI-MS** ( $M_w$  1100.44):  $m/z$  1100.5 [ $M + \text{H}$ ] $^+$ , 1122.6 [ $M + \text{Na}$ ] $^+$

### **Boc Gly<sup>u</sup>-Val<sup>u</sup>-Ala<sup>u</sup>-Leu<sup>u</sup>-NHMe, (25)**

**25** was prepared from **11d** (171 mg, 0.568 mmol) and **12** (300 mg, 0.598 mmol) as described in the general procedure. After completion (12h), the desired compound **25** was precipitated upon addition of water and washed with 1M  $\text{KHSO}_4$  aqueous solution and water. Finally **25** was dried over vacuum. (360 mg, quantitative).  $^1\text{H NMR}$  : (300MHz,  $\text{CD}_3\text{OH}$ )  $\delta$  = 6.72 (m, 1H, NH), 6.36 (m, 1H, NH), 6.27 (m, 1H, NH), 6.17 (m, 1H, NH), 6.09 (m, 1H, NH), 5.99 (d,  $J$  = 9.4 Hz, 1H, NH), 5.91-5.79 (m, 3H, NH), 4.08-3.96 (m, 1H, CHN), 3.94-3.83 (m, 1H, CHN), 3.69-3.44 (m, 4H, CHN- $\text{CH}_2\text{N}$ ), 3.11-2.94 (m, 2H,  $\text{CH}_2\text{N}$ ), 2.73 (d,  $J$  = 4.1 Hz, 3H,  $\text{CH}_3\text{N}$ ), 2.70-2.42 (m, 5H,  $\text{CH}_2\text{N}$ ), 1.78-1.58 (m, 2H, CH), 1.48 (s, 9H, Boc), 1.37-1.21 (m,

2H, CH<sub>2</sub>), 1.06 (d, J = 6.8 Hz, 3H, CH<sub>3</sub>), 0.99-0.89 (m, 12H, CH<sub>3</sub>). **ESI-MS** (Mw 587.76) : *m/z* 588.3 [M+H]<sup>+</sup>, 611.4 [M+Na]<sup>+</sup>

#### **Boc Gly<sup>u</sup>-Gly<sup>u</sup>-Val<sup>u</sup>-Ala<sup>u</sup>-Leu<sup>u</sup>-NHMe, (26)**

**26** was prepared from **11d** (112 mg, 0.371 mmol) and **25** (230 mg, 0.391 mmol) as described in the general procedure. After completion (12h), the desired compound **26** was precipitated upon addition of water and washed with 1M KHSO<sub>4</sub> aqueous solution and water. Finally **26** was dried over vacuum. (175 mg, 66 %). **<sup>1</sup>H NMR** : (300MHz, CD<sub>3</sub>OH) δ = 6.70 (m, 1H, NH), 6.40 (m, 1H, NH), 6.32 (m, 1H, NH), 6.28-6.14 (m, 3H, NH), 6.12-5.95 (m, 4H, NH), 5.87 (d, J = 9.8 Hz, 1H, NH), 4.08-3.96 (m, 1H, CHN), 3.95-3.84 (m, 1H, CHN), 3.68-3.43 (m, 7H, CHN-CH<sub>2</sub>N), 3.30-2.80 (m, 6H, CH<sub>2</sub>N), 2.73 (d, J = 4.3 Hz, 3H, CH<sub>3</sub>N), 2.65-2.54 (m, 1H, CH<sub>2</sub>N), 2.51-2.40 (m, 1H, CH<sub>2</sub>N), 1.78-1.58 (m, 2H, CH), 1.48 (s, 9H, Boc), 1.34-1.22 (m, 2H, CH<sub>2</sub>), 1.06 (d, J = 6.8 Hz, 3H, CH<sub>3</sub>), 1.00-0.86 (m, 12H, CH<sub>3</sub>). **ESI-MS** (Mw 673.85) : *m/z* 674.3 [M+H]<sup>+</sup>, 697.4 [M+Na]<sup>+</sup>

#### **Boc Leu<sup>u</sup>-Gly<sup>u</sup>-Gly<sup>u</sup>-Val<sup>u</sup>-Ala<sup>u</sup>-Leu<sup>u</sup>-NHMe, (27)**

**27** was prepared from **11a** (80 mg, 0.225 mmol) and **26** (160 mg, 0.237 mmol) as described in the general procedure. After completion (12h), the desired compound **27** was precipitated upon addition of water and washed with 1M KHSO<sub>4</sub> aqueous solution and water. Finally **27** was dried over vacuum. (160 mg, 82 %). **<sup>1</sup>H NMR** : (300MHz, CD<sub>3</sub>OH) δ = 6.52 (d, J = 9.3 Hz, 1H, NH), 6.46-6.35 (m, 3H, NH), 6.31 (m, 1H, NH), 6.22 (m, 1H, NH), 6.20-6.00 (m, 6H, NH), 5.97 (m, 1H, NH), 4.13-3.98 (m, 1H, CHN), 3.95-3.85 (m, 1H, CHN), 3.84-3.75 (m, 1H, CHN), 3.71-3.38 (m, 9H, CHN-CH<sub>2</sub>N), 3.01-2.77 (m, 4H, CH<sub>2</sub>N), 2.74 (d, J = 4.1 Hz, 3H, CH<sub>3</sub>N), 2.71-2.62 (m, 2H, CH<sub>2</sub>N), 2.60-2.49 (m, 1H, CH<sub>2</sub>N), 2.48-2.37 (m, 1H, CH<sub>2</sub>N), 1.79-1.57 (m, 3H, CH), 1.49 (s, 9H, Boc), 1.37-1.19 (m, 4H, CH<sub>2</sub>), 1.07 (d, J = 6.8 Hz, 3H, CH<sub>3</sub>), 1.00-0.86 (m, 18H, CH<sub>3</sub>). **ESI-MS** (Mw 816.5) : *m/z* 817.5 [M+H]<sup>+</sup>, 839.5 [M+Na]<sup>+</sup>

#### **Boc Ala<sup>u</sup>-Leu<sup>u</sup>-Gly<sup>u</sup>-Gly<sup>u</sup>-Val<sup>u</sup>-Ala<sup>u</sup>-Leu<sup>u</sup>-NHMe, (28)**

**28** was prepared from **11b** (51 mg, 0.163 mmol) and **27** (140 mg, 0.172 mmol) as described in the general procedure. After completion (12h), the desired compound **28** was precipitated upon addition of water and washed with 1M KHSO<sub>4</sub> aqueous solution and water. Finally **28** was dried over vacuum. (125 mg, 79 %). **<sup>1</sup>H NMR** : (300MHz, CD<sub>3</sub>OH) δ = 6.70-6.57 (m, 2H, NH), 6.49-6.34 (m, 5H, NH), 6.26-6.19 (m, 2H, NH), 6.16-5.98 (m, 6H, NH), 4.14-3.98 (m, 1H, CHN), 3.96-3.85 (m, 1H, CHN), 3.83-3.73 (m, 1H, CHN), 3.70-3.38 (m, 10H, CHN-CH<sub>2</sub>N), 3.14-2.77 (m, 4H, CH<sub>2</sub>N), 2.74 (d, J = 4.5 Hz, 3H, CH<sub>3</sub>N), 2.72-2.62 (m, 2H, CH<sub>2</sub>N), 2.59-2.35 (m, 4H, CH<sub>2</sub>N), 1.80-1.55 (m, 3H, CH), 1.49 (s, 9H, Boc), 1.36-1.20 (m, 4H, CH<sub>2</sub>), 1.14-1.04 (m, 6H, CH<sub>3</sub>), 1.00-0.86 (m, 18H, CH<sub>3</sub>). **ESI-MS** (Mw 916.17): *m/z* 918.5 [M+H]<sup>+</sup>, 940.7 [M+Na]<sup>+</sup>



### Boc Val<sup>u</sup>-Ala<sup>u</sup>-Leu<sup>u</sup>-Gly<sup>u</sup>-Gly<sup>u</sup>-Val<sup>u</sup>-Ala<sup>u</sup>-Leu<sup>u</sup>-NHMe, (6)

**6** was prepared from **11c** (35 mg, 0.104 mmol) and **28** (100 mg, 0.109 mmol) as described in the general procedure. After completion (12h), the reaction mixture was evaporated, dissolved in ethyl acetate and treated with saturated NaHCO<sub>3</sub> aqueous solution, 1M KHSO<sub>4</sub> aqueous solution and brine. The organic layer was then dried over MgSO<sub>4</sub> and evaporated. Flash column chromatography (CH<sub>2</sub>Cl<sub>2</sub>-MeOH (v/v), 90:10) over silica gel gave **6** as a white product (85 mg, 75 %). **<sup>1</sup>H NMR** : (300MHz, CD<sub>3</sub>OH) δ = 6.73-6.62 (m, 3H, NH), 6.53 (m, 1H, NH), 6.50-6.39 (m, 3H, NH), 6.30-6.20 (m, 3H, NH), 6.18-5.96 (m, 5H, NH), 5.92 (d, J = 9.7 Hz, 1H, NH), 5.84 (m, 1H, NH), 4.15-3.84 (m, 4H, CHN), 3.80-3.46 (m, 12H, CHN-CH<sub>2</sub>N), 2.93-2.79 (m, 3H, CH<sub>2</sub>N), 2.74 (d, J = 4.0 Hz, 3H, CH<sub>3</sub>N), 2.71-2.31 (m, 7H, CH<sub>2</sub>N), 1.81-1.57 (m, 4H, CH), 1.50 (s, 9H, Boc), 1.35-1.21 (m, 4H, CH<sub>2</sub>), 1.11-1.04 (m, 6H, CH<sub>3</sub>), 1.01-0.87 (m, 24H, CH<sub>3</sub>). **<sup>13</sup>C NMR**: (101 MHz, CD<sub>3</sub>OH) δ 161.39, 161.24, 161.12, 161.03, 160.71, 160.58, 159.92, 158.72, 79.36, 56.81, 55.37, 46.40, 45.83, 45.36, 45.31, 43.74, 43.19, 42.90, 42.09, 41.59, 41.36, 39.64, 39.59, 31.07, 30.96, 27.86, 25.96, 25.29, 24.91, 24.29, 22.67, 21.72, 21.51, 19.16, 18.10, 17.83, 17.57, 17.31. **ESI-MS** (Mw 1044.34) : *m/z* 1044.7 [M+H]<sup>+</sup>, 1066.7 [M+Na]<sup>+</sup>

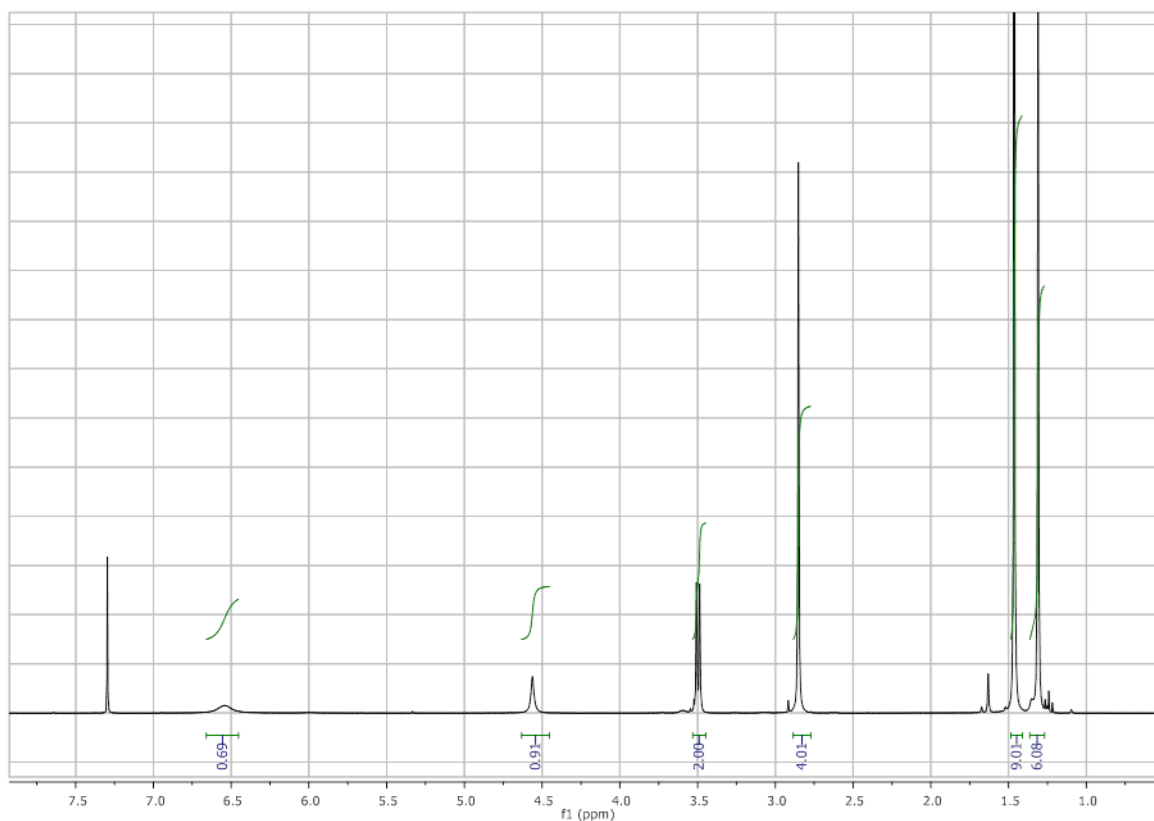

**Figure S1:** <sup>1</sup>H NMR spectra of carbamate **BB1**, recording in CDCl<sub>3</sub>, (300MHz)

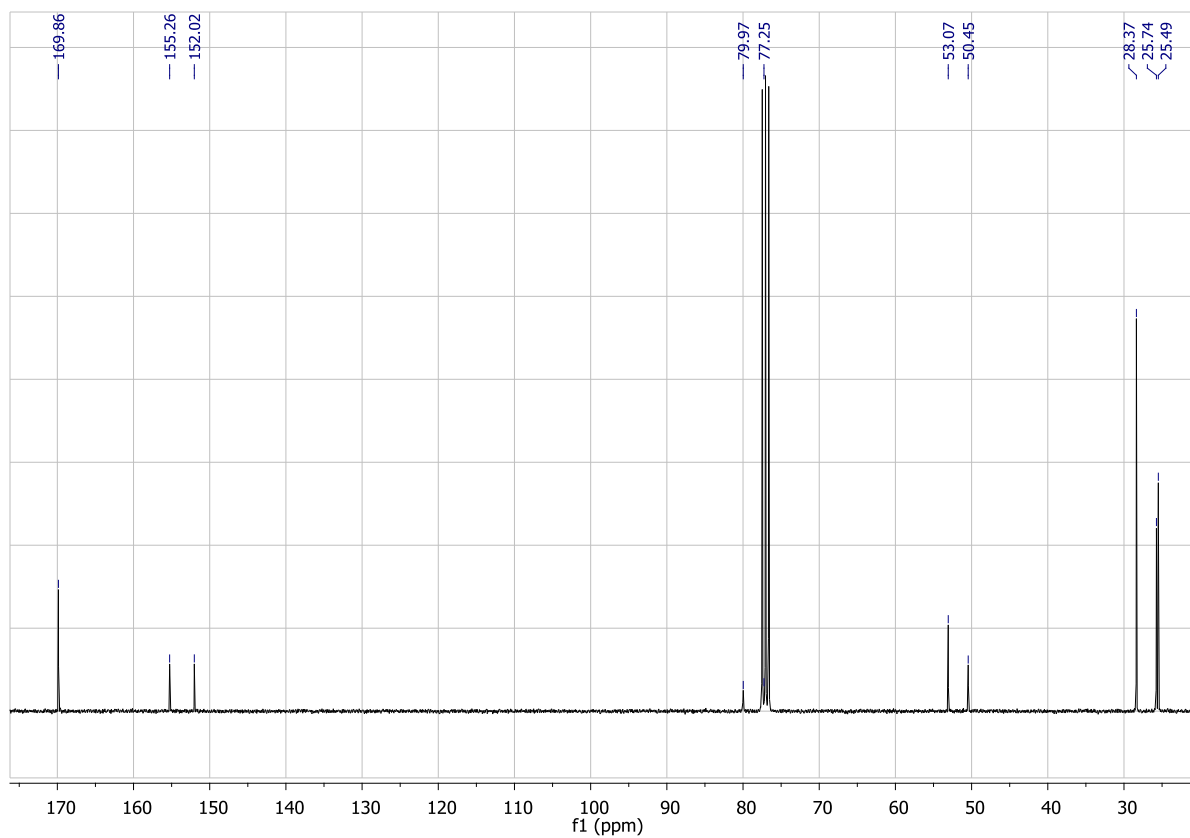

**Figure S2:**  $^{13}\text{C}$  NMR spectra of carbamate **BB1**, recording in  $\text{CDCl}_3$ , (75MHz)

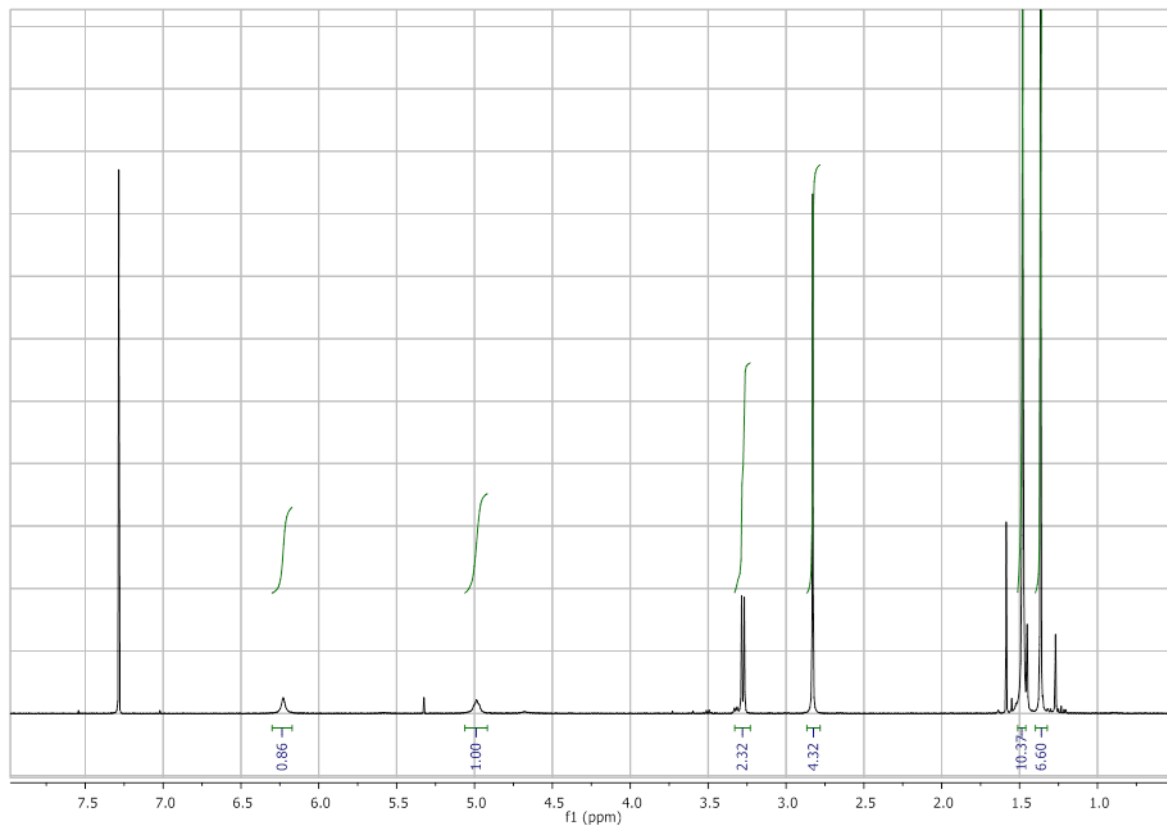

**Figure S3:**  $^1\text{H}$  NMR spectra of carbamate **BB2**, recording in  $\text{CDCl}_3$ , (300MHz)

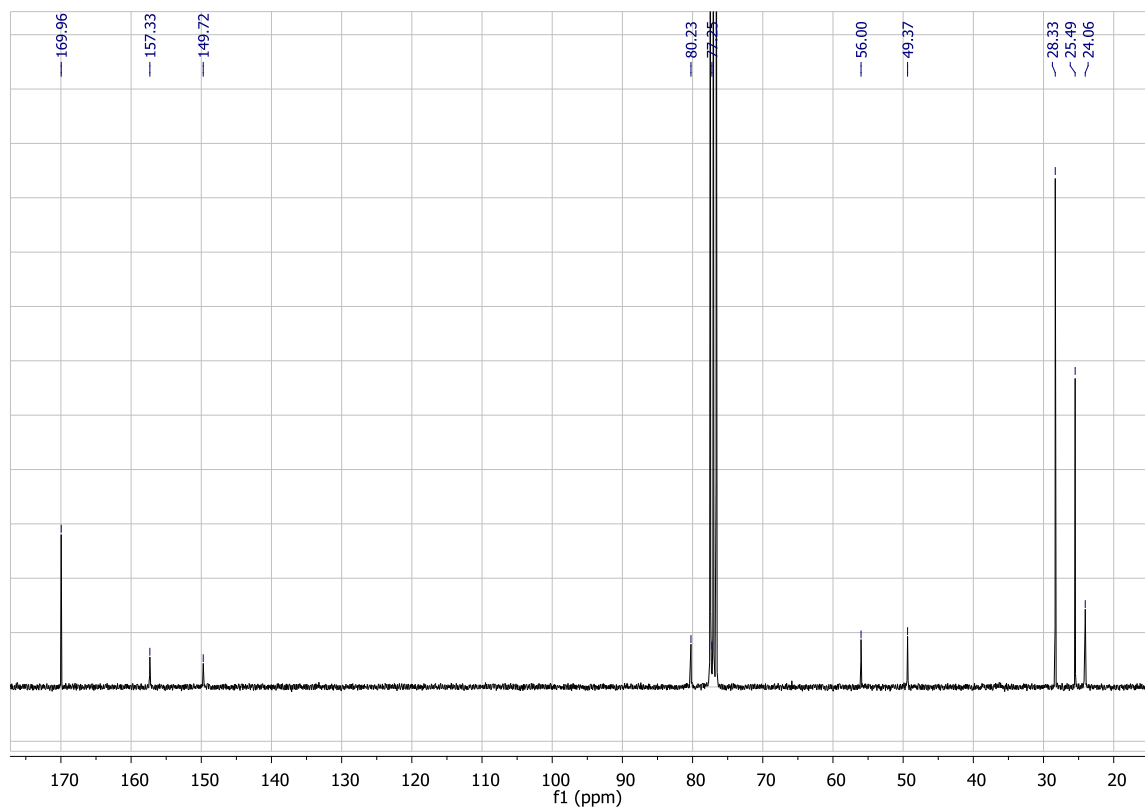

Figure S4:  $^{13}\text{C}$  NMR spectra of compound **BB2**, recording in  $\text{CDCl}_3$ , (75MHz)

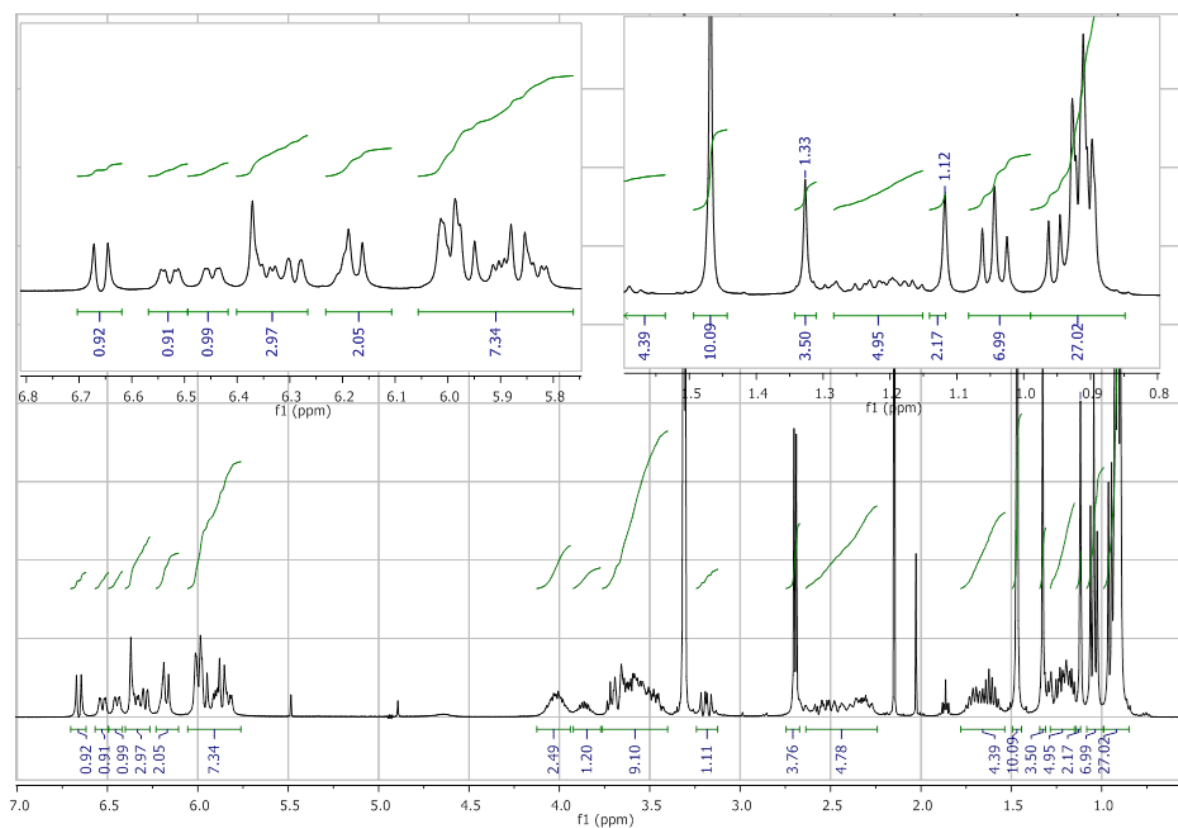

Figure S5:  $^1\text{H}$  NMR spectra of compound **2**, recording in  $\text{CD}_3\text{OH}$ , (400MHz)

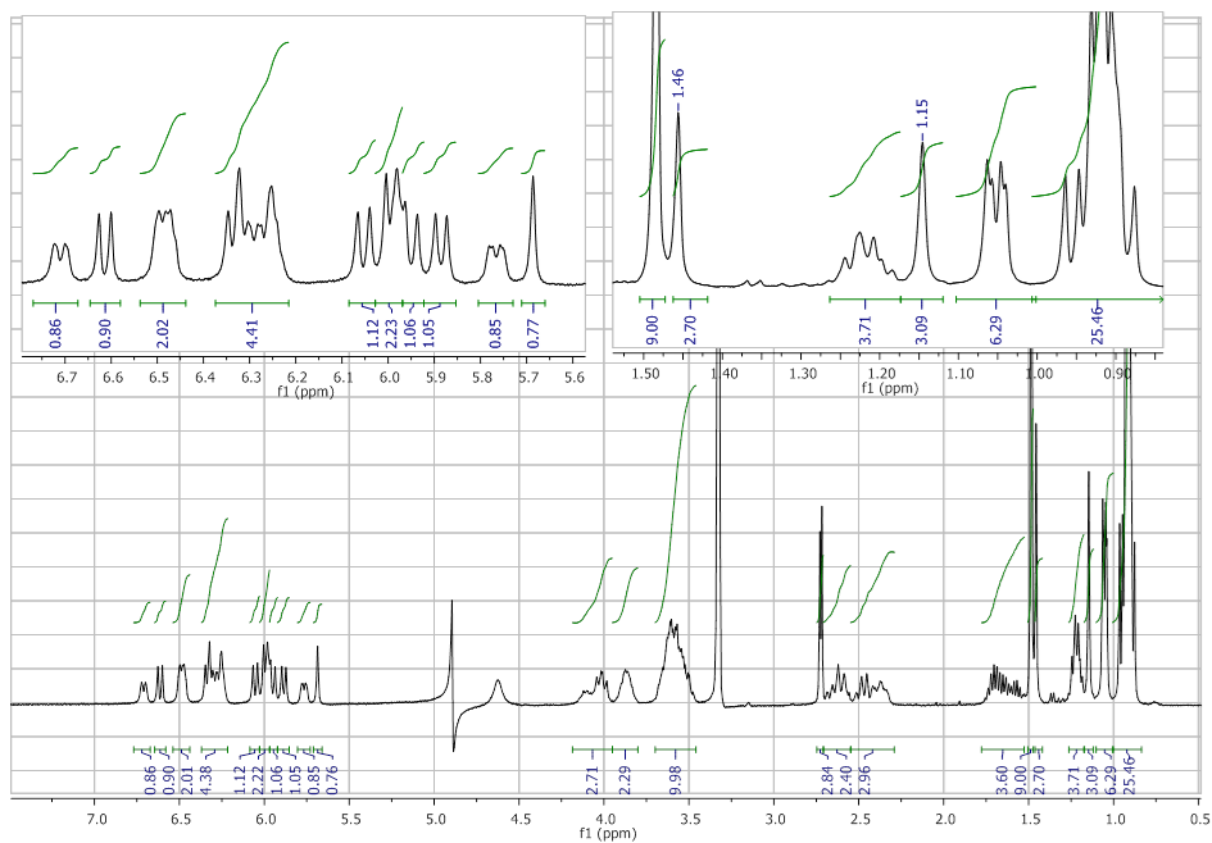

Figure S6:  $^1\text{H}$  NMR spectra of compound **3**, recording in  $\text{CD}_3\text{OH}$ , (400MHz)

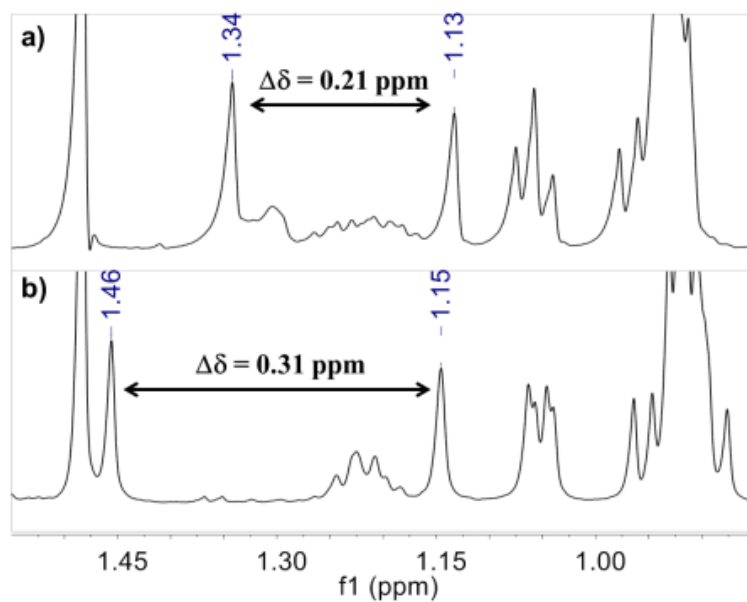

Figure S7:  $^1\text{H}$  NMR region of methyl protons of DADME residues in a) oligoarea **2** and b) oligoarea **3**

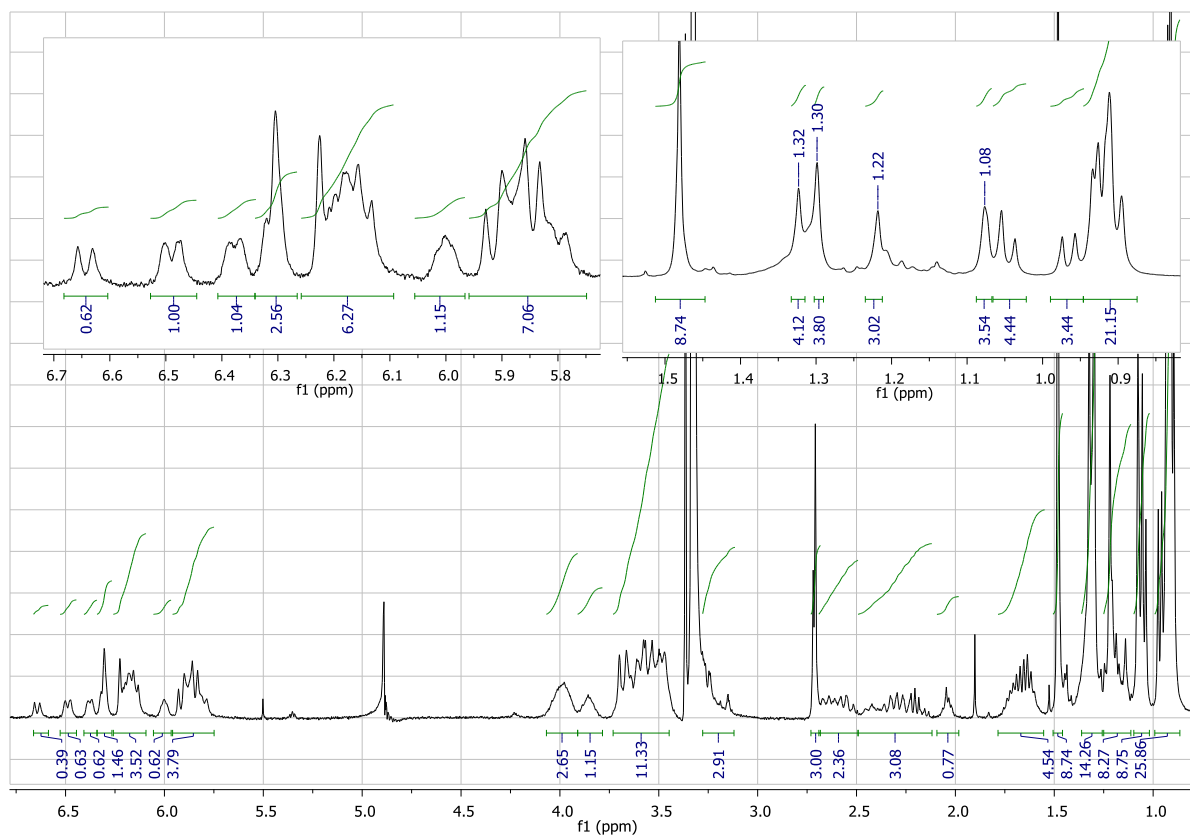

**Figure S8:**  $^1\text{H}$  NMR spectra of compound **4** recording in  $\text{CD}_3\text{OH}$  (400MHz)

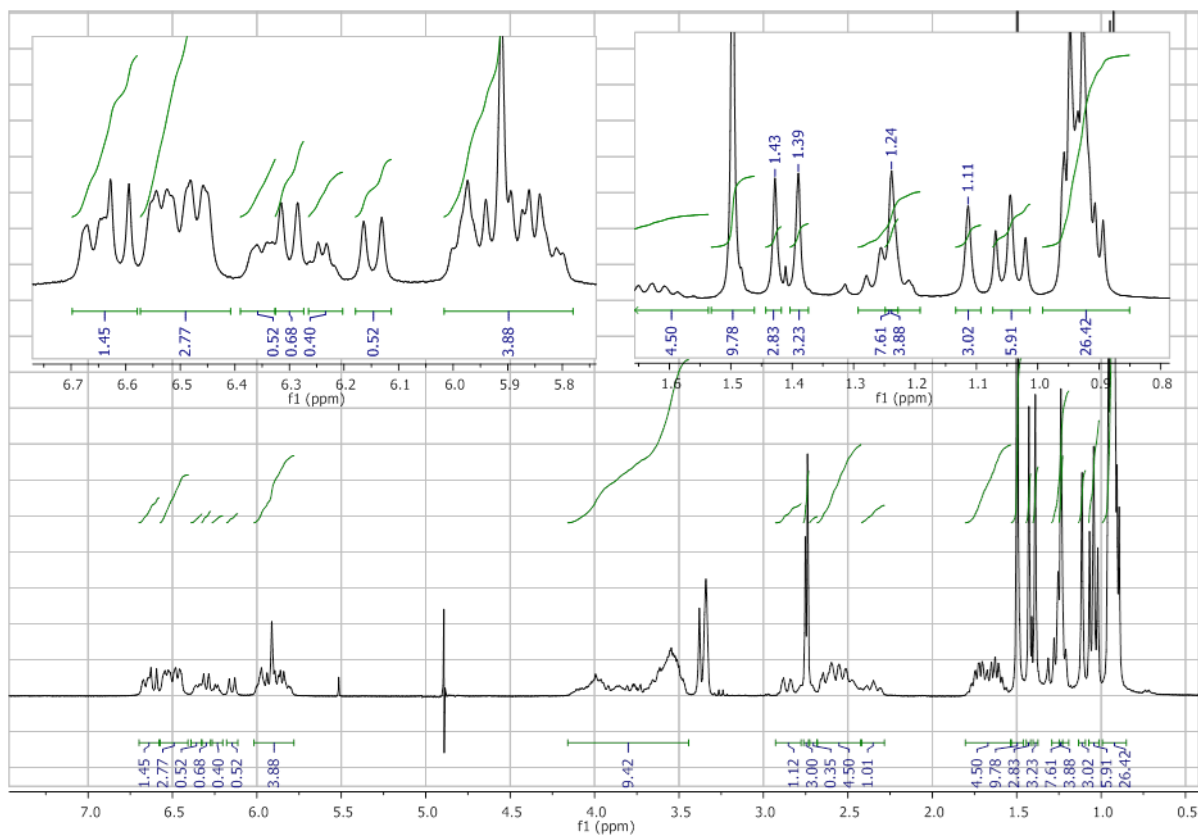

**Figure S9:**  $^1\text{H}$  NMR spectra of compound **5**, recording in  $\text{CD}_3\text{OH}$ , (300MHz)

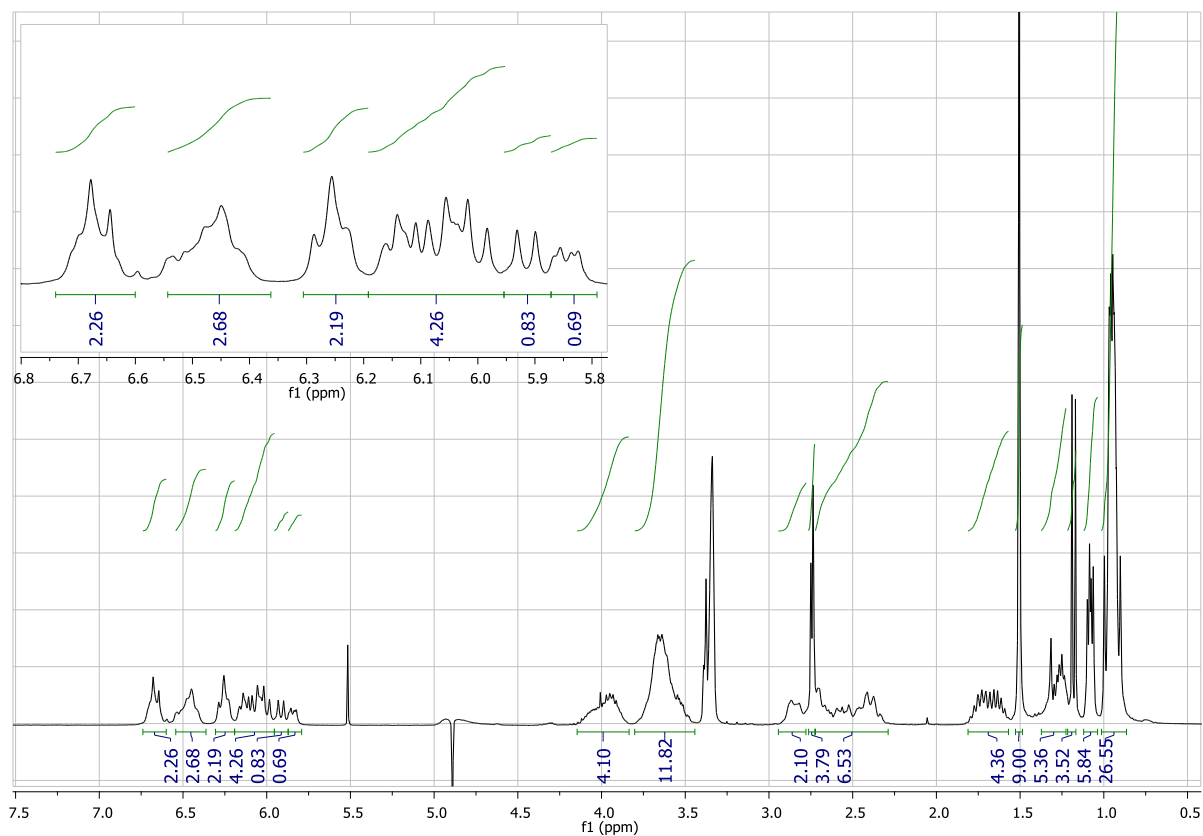

**Figure S10:** <sup>1</sup>H NMR spectra of compound **6**, recording in CD<sub>3</sub>OH, (300MHz)

## NMR Characterization

Experiments were recorded on a DPX-400 NMR spectrometer (Bruker Biospin) with a vertical 9.4T narrow-bore/ultrashield magnet operating at 400 MHz for  $^1\text{H}$  observation by means of a 5-mm direct QNP  $^1\text{H}/^{13}\text{C}/^{31}\text{P}/^{19}\text{F}/^2\text{H}$  probe with Z gradient capabilities. The four oligomers were dissolved in  $\text{CD}_3\text{OH}$  at room temperature.

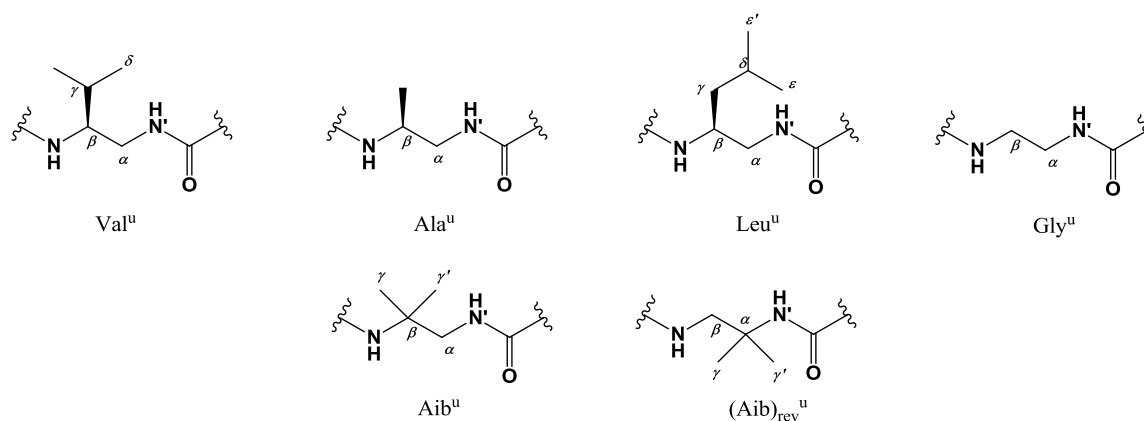

**Scheme S8:** Nomenclature used for the description of the various protons for each residue type

**Table S1:**  $^1\text{H}$  NMR chemical shifts (in ppm) of **2** in  $\text{CD}_3\text{OH}$  (400 MHz)

| Residue                | N'H       | NH   | $^{\alpha}\text{CH}^1$ | $^{\alpha}\text{CH}^2$ | $^{\beta}\text{CH}$ | $^{\gamma}\text{CH}$ | $^{\delta}\text{CH}$ | $^{\epsilon}\text{CH}$ | term CH |
|------------------------|-----------|------|------------------------|------------------------|---------------------|----------------------|----------------------|------------------------|---------|
| NH-Me                  |           | 6,20 |                        |                        |                     |                      |                      |                        | 2,71    |
| <b>Leu<sup>u</sup></b> | <b>U1</b> | 6,44 | 5,99                   | 3,58                   | 2,66                | 3,88                 | 1,23                 | 1,70                   | 0,93    |
| <b>Ala<sup>u</sup></b> | <b>U2</b> | 6,34 | 6,00                   | 3,51                   | 2,40                | 4,01                 | 1,06                 |                        |         |
| <b>Val<sup>u</sup></b> | <b>U3</b> | 5,89 | 6,17                   | 3,56                   | 2,49                | 6,67                 | 1,61                 | 0,92                   |         |
| <b>Aib<sup>u</sup></b> | <b>U4</b> | 6,30 | 6,37                   | 3,69                   | 3,20                |                      | 1,34                 | 1,13                   |         |
| <b>Leu<sup>u</sup></b> | <b>U5</b> | 6,53 | 5,97                   | 3,61                   | 2,32                | 4,03                 | 1,19                 | 1,72                   | 0,92    |
| <b>Ala<sup>u</sup></b> | <b>U6</b> | 5,83 | 5,87                   | 3,59                   | 2,34                | 4,05                 | 1,04                 |                        |         |
| <b>Val<sup>u</sup></b> | <b>U7</b> | 6,00 | 6,65                   | 3,47                   | 2,56                | 3,63                 | 1,64                 | 0,94                   |         |
| <b>Boc</b>             |           |      |                        |                        |                     |                      |                      |                        | 1,48    |

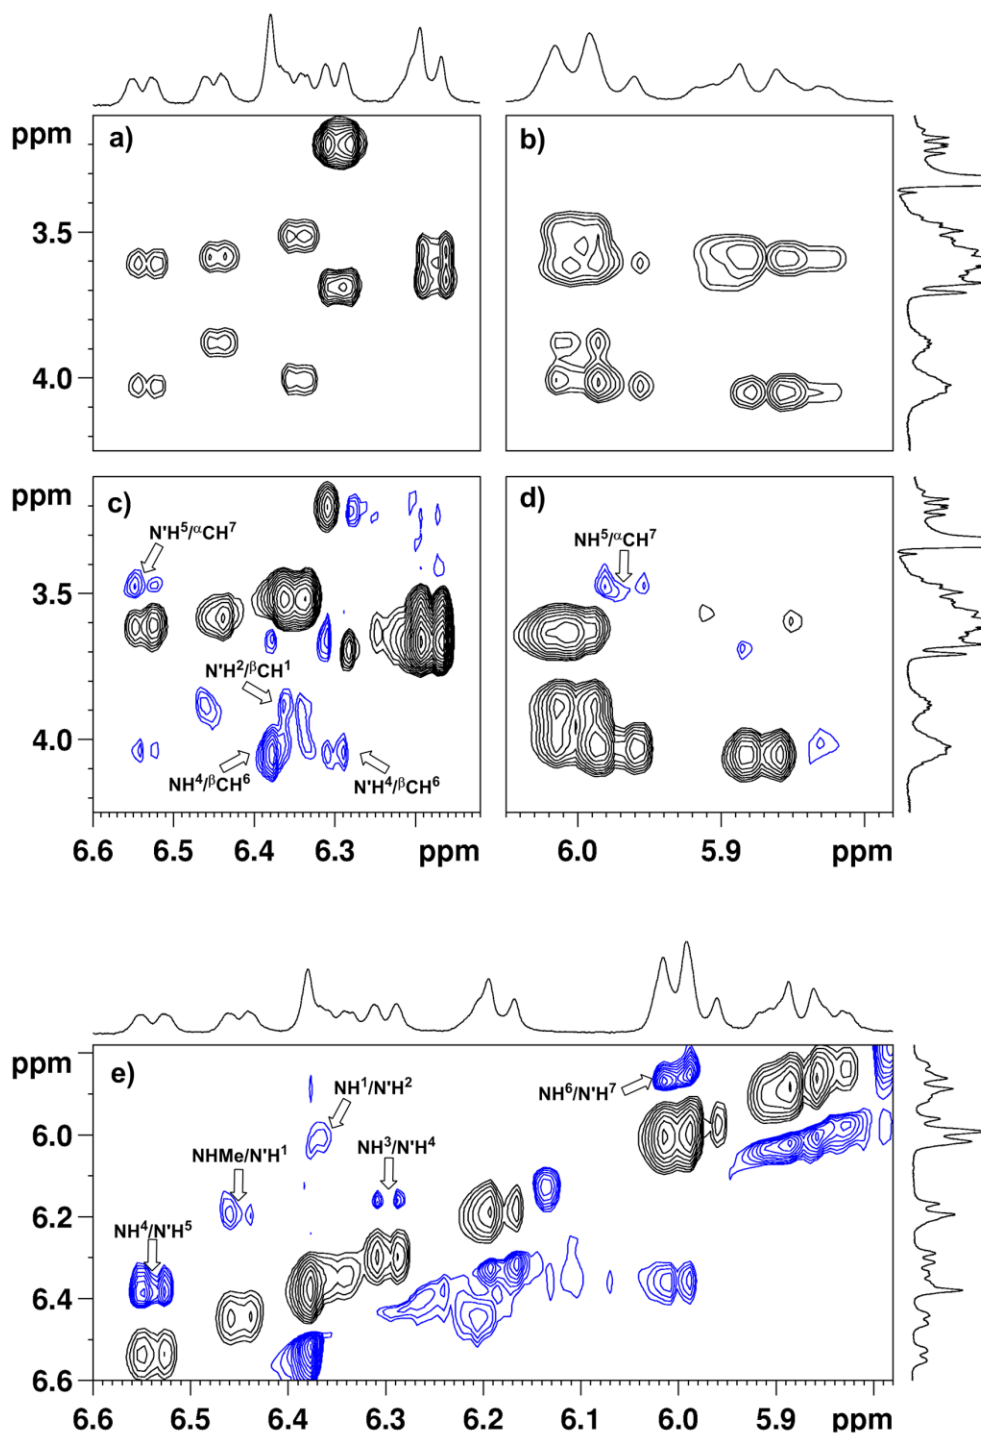

**Figure S11:** Representative sets of NOE connectivities observed for **2** in CD<sub>3</sub>OH (400MHz). a) and b) part of the TOCSY plot shown for comparison c) and d) Part of the NH/CH region of the ROESY. e) Part of the NH/NH region of the ROESY plot of **2** in CD<sub>3</sub>OH



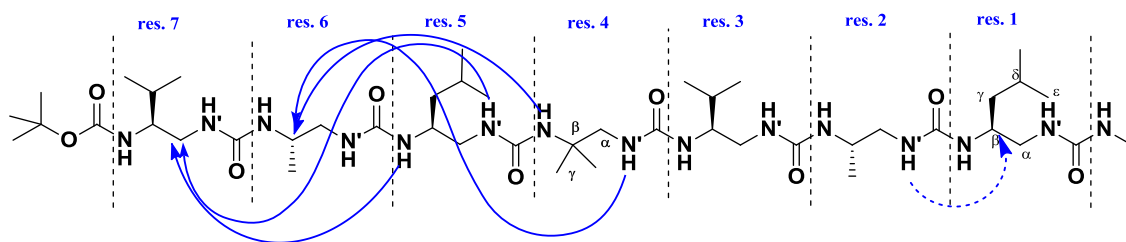

**Scheme S9:** NOE connectivities observed for **2** in CD<sub>3</sub>OH. N'H(i+1)/β'CH(i) represented in dashed arrows have been attributed previously as Z-E isomerization<sup>5</sup>

**Table S2:** <sup>1</sup>H NMR chemical shifts (in ppm) of **3** in CD<sub>3</sub>OH (400 MHz)

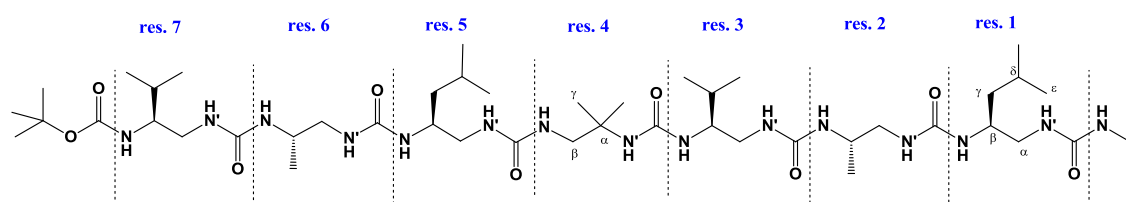

| Residue                           | N'H | NH   | α'CH <sup>1</sup> | α'CH <sup>2</sup> | β'CH | γ'CH | δ'CH | ε'CH | term CH |
|-----------------------------------|-----|------|-------------------|-------------------|------|------|------|------|---------|
| NH-Me                             |     | 6,25 |                   |                   |      |      |      |      | 2,73    |
| Leu <sup>u</sup>                  | U1  | 6,29 | 6,34              | 3,60              | 2,65 | 3,87 | 1,22 | 1,7  | 0,92    |
| Ala <sup>u</sup>                  | U2  | 6,47 | 6,05              | 3,57              | 2,38 | 4,02 | 1,06 |      |         |
| Val <sup>u</sup>                  | U3  | 6,49 | 5,95              | 3,55              | 2,45 | 3,62 | 1,58 | 0,90 |         |
| (Aib) <sub>rev</sub> <sup>u</sup> | U4  | 5,69 | 6,27              |                   |      | 4,01 | 2,60 | 1,46 | 1,15    |
| Leu <sup>u</sup>                  | U5  | 6,71 | 5,99              | 3,64              | 2,48 | 3,86 | 1,21 | 1,71 | 0,91    |
| Ala <sup>u</sup>                  | U6  | 5,76 | 5,88              | 3,58              | 2,37 | 4,11 | 1,05 |      |         |
| Val <sup>u</sup>                  | U7  | 5,98 | 6,61              | 3,51              | 2,59 | 3,59 | 1,64 | 0,93 |         |
| Boc                               |     |      |                   |                   |      |      |      |      |         |

<sup>5</sup> A. Violette, M. C. Averlant-Petit, V. Semetey, C. Hemmerlin, R. Casimir, R. Graff, M. Marraud, J.-P. Briand, D. Rognan, G. Guichard, *JACS*, **2005**, *127*, 2156-2164.

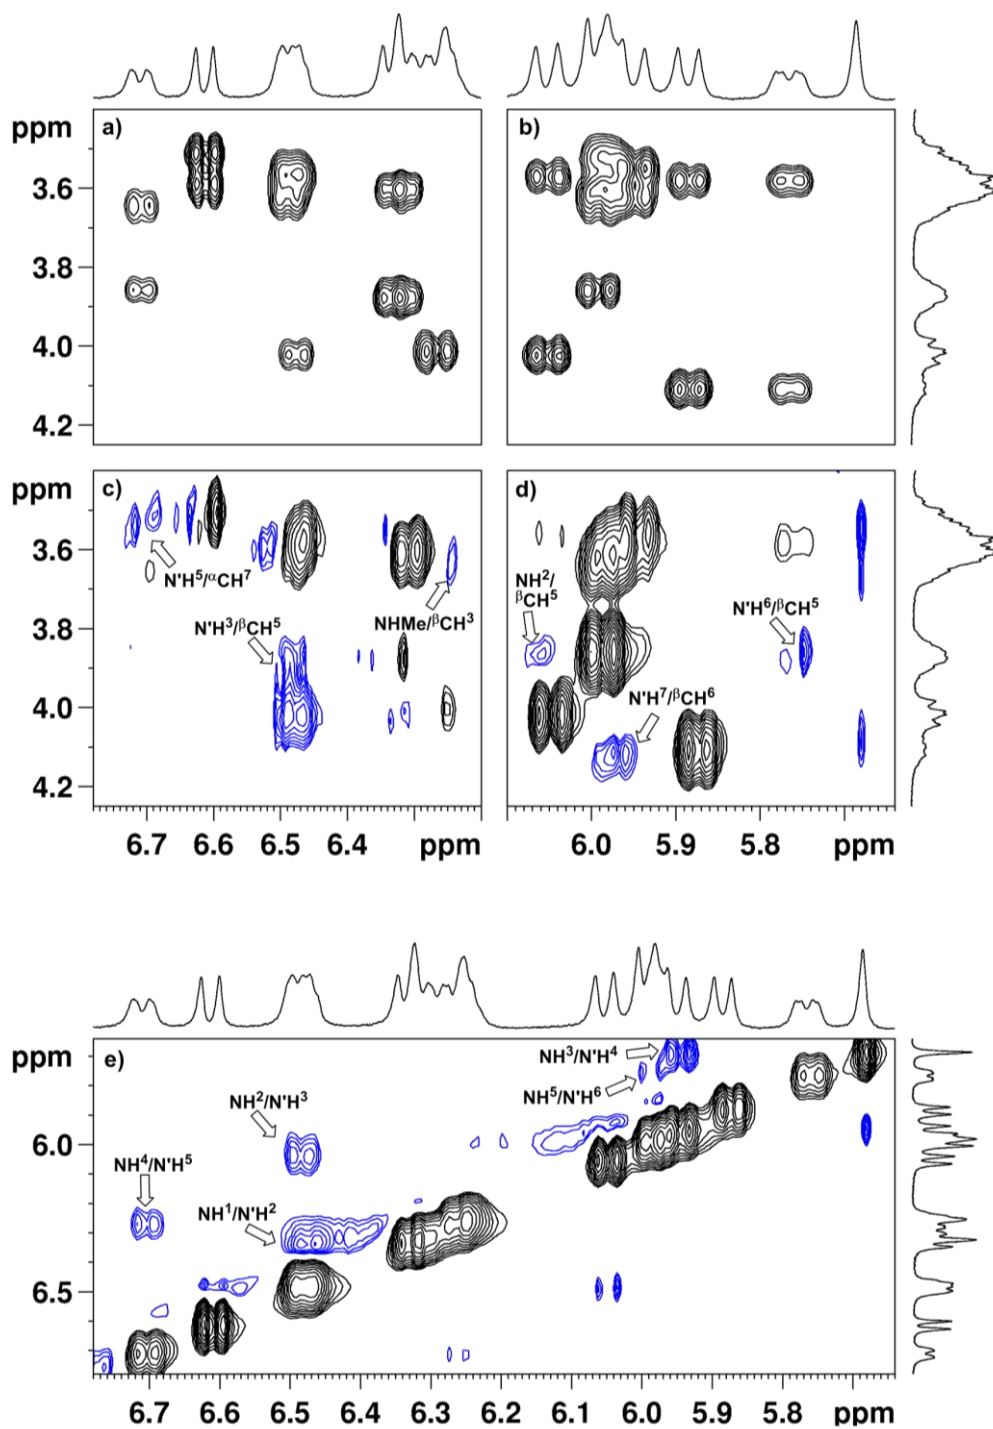

**Figure S12:** Representative sets of NOe connectivities observed for **3** in CD<sub>3</sub>OH (400MHz). a) and b) part of the TOCSY plot shown for comparison c) and d) Part of the NH/CH region of the ROESY e) Part of the NH/NH region of the ROESY plot of **3**.

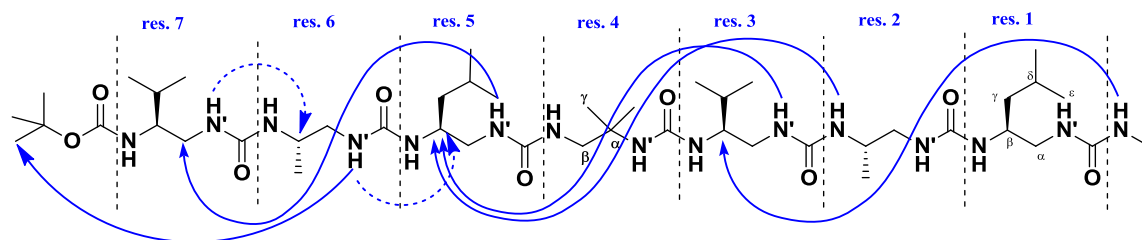

**Scheme S10:** NOE connectivities observed for **3** in CD<sub>3</sub>OH. N'H(*i*+1)/βCH(*i*) represented in dashed arrows have been attributed previously as *Z-E* isomerization<sup>6</sup>

**Table S3:** <sup>1</sup>H NMR chemical shifts (in ppm) of **4** in CD<sub>3</sub>OH (400 MHz)

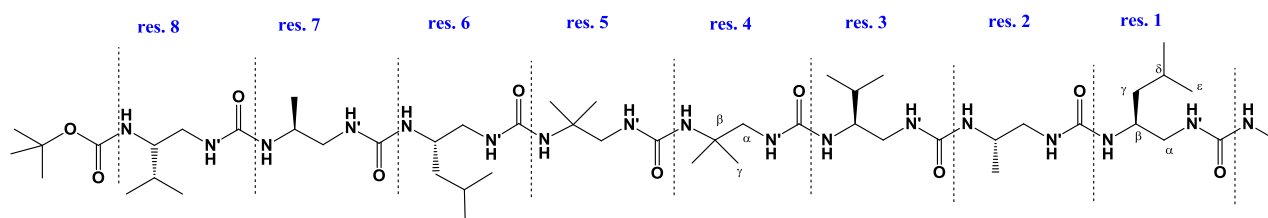

| Residue             | N'H  | NH   | <sup>α</sup> CH <sup>1</sup> | <sup>α</sup> CH <sup>2</sup> | βCH  | γCH       | δCH  | εCH  | term CH |
|---------------------|------|------|------------------------------|------------------------------|------|-----------|------|------|---------|
| NH-Me               |      | 6,18 |                              |                              |      |           |      |      | 2,71    |
| Leu <sup>u</sup> U1 | 6,37 | 6,14 | 3,56                         | 2,67                         | 3,85 | 1,68      | 1,20 | 0,90 |         |
| Ala <sup>u</sup> U2 | 6,20 | 5,84 | 3,49                         | 2,41                         | 3,96 | 1,04      |      |      |         |
| Val <sup>u</sup> U3 | 5,87 | 5,84 | 3,50                         | 2,61                         | 3,69 | 1,63      | 0,91 |      |         |
| Aib <sup>u</sup> U4 | 6,16 | 6,22 | 3,55                         | 3,32                         |      | 1,30 1,22 |      |      |         |
| Aib <sup>u</sup> U5 | 6,32 | 6,30 | 3,68                         | 3,26                         |      | 1,31 1,07 |      |      |         |
| Leu <sup>u</sup> U6 | 6,49 | 5,90 | 3,57                         | 2,26                         | 3,98 | 1,71      | 1,18 | 0,91 |         |
| Ala <sup>u</sup> U7 | 5,80 | 5,87 | 3,61                         | 2,32                         | 4,02 | 1,06      |      |      |         |
| Val <sup>u</sup> U8 | 5,99 | 6,64 | 3,47                         | 2,55                         | 3,63 | 1,64      | 0,93 |      |         |
| Boc                 |      |      |                              |                              |      |           |      |      | 1,47    |

<sup>6</sup> A. Violette, M. C. Averlant-Petit, V. Semetey, C. Hemmerlin, R. Casimir, R. Graff, M. Marraud, J.-P. Briand, D. Rognan, G. Guichard, *JACS*, **2005**, *127*, 2156-2164.

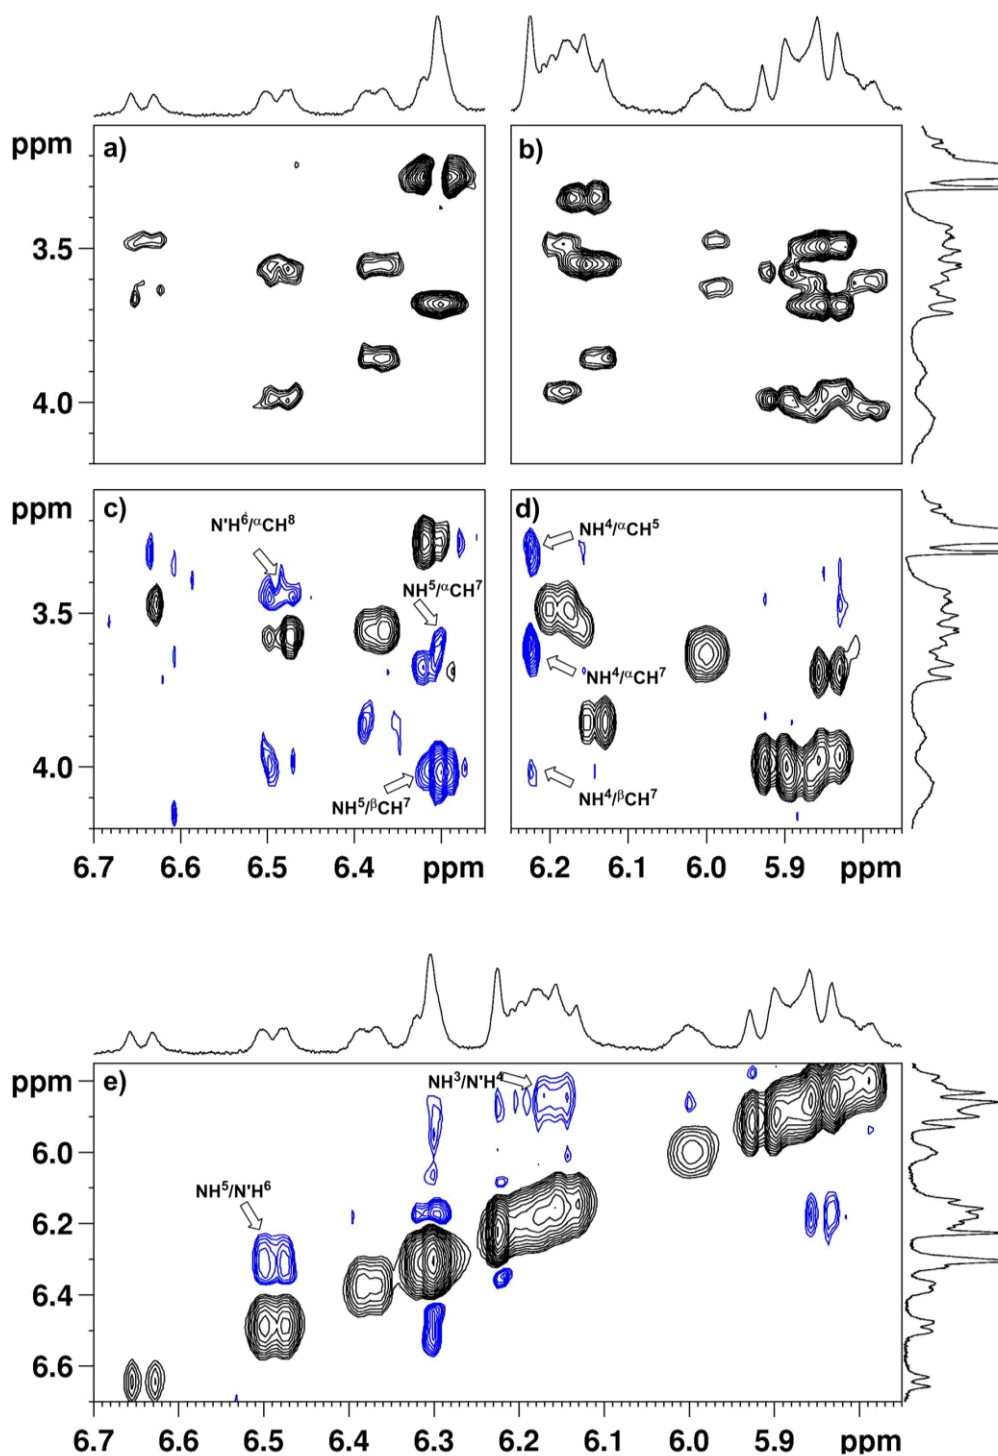

**Figure S13:** Representative sets of NOe connectivities observed for **4** in CD<sub>3</sub>OH (400MHz). a) and b) part of the TOCSY plot shown for comparison c) and d) Part of the NH/CH region of the ROESY e) Part of the NH/NH region of the ROESY plot of **4**.

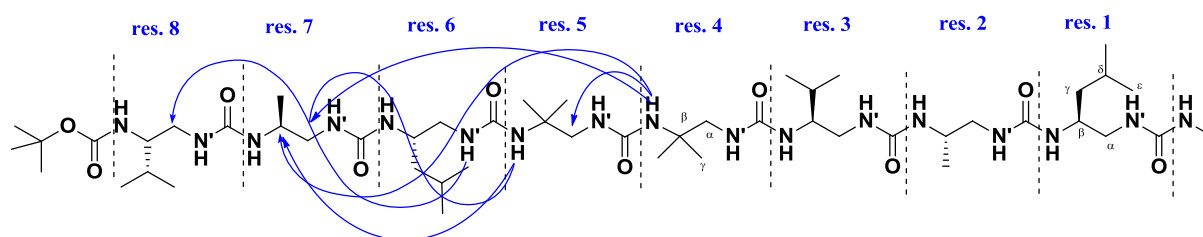

**Scheme S11:** NOE connectivities observed for **4** in CD<sub>3</sub>OH.

**Table S4:** <sup>1</sup>H NMR chemical shifts (in ppm) of **5** in CD<sub>3</sub>OH (700 MHz)

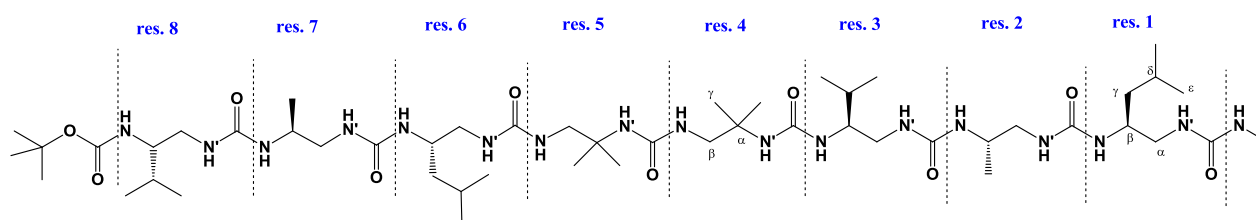

| Residue                           | N <sup>u</sup> H | NH    | <sup>u</sup> CH <sup>1</sup> | <sup>u</sup> CH <sup>2</sup> | <sup>β</sup> CH | <sup>γ</sup> CH | <sup>δ</sup> CH | <sup>ε</sup> CH | term CH |
|-----------------------------------|------------------|-------|------------------------------|------------------------------|-----------------|-----------------|-----------------|-----------------|---------|
| NH-Me                             |                  | 6,23  |                              |                              |                 |                 |                 |                 | 2,73    |
| Leu <sup>u</sup>                  | U1               | 6,34  | 6,29                         | 3,57                         | 2,73            | 3,85            | 1,71            | 1,25            | 0,93    |
| Ala <sup>u</sup>                  | U2               | 6,526 | 6,14                         | 3,55                         | 2,45            | 4,00            | 1,05            |                 |         |
| Val <sup>u</sup>                  | U3               | 6,46  | 5,86                         | 3,56                         | 2,51            | 3,55            | 1,61            | 0,91            |         |
| (Aib) <sub>rev</sub> <sup>u</sup> | U4               | 5,904 | 6,53                         |                              |                 | 3,96            | 2,63            | 1,41            | 1,08    |
| (Aib) <sub>rev</sub> <sup>u</sup> | U5               | 5,899 | 6,46                         |                              |                 | 3,76            | 2,86            | 1,38            | 1,22    |
| Leu <sup>u</sup>                  | U6               | 6,65  | 5,94                         | 3,65                         | 2,54            | 3,98            | 1,72            | 1,22            | 0,94    |
| Ala <sup>u</sup>                  | U7               | 5,81  | 5,84                         | 3,50                         | 2,34            | 4,08            | 1,02            |                 |         |
| Val <sup>u</sup>                  | U8               | 5,96  | 6,61                         | 3,53                         | 2,58            | 3,53            | 1,63            | 0,93            |         |
| Boc                               |                  |       |                              |                              |                 |                 |                 |                 | 1,48    |

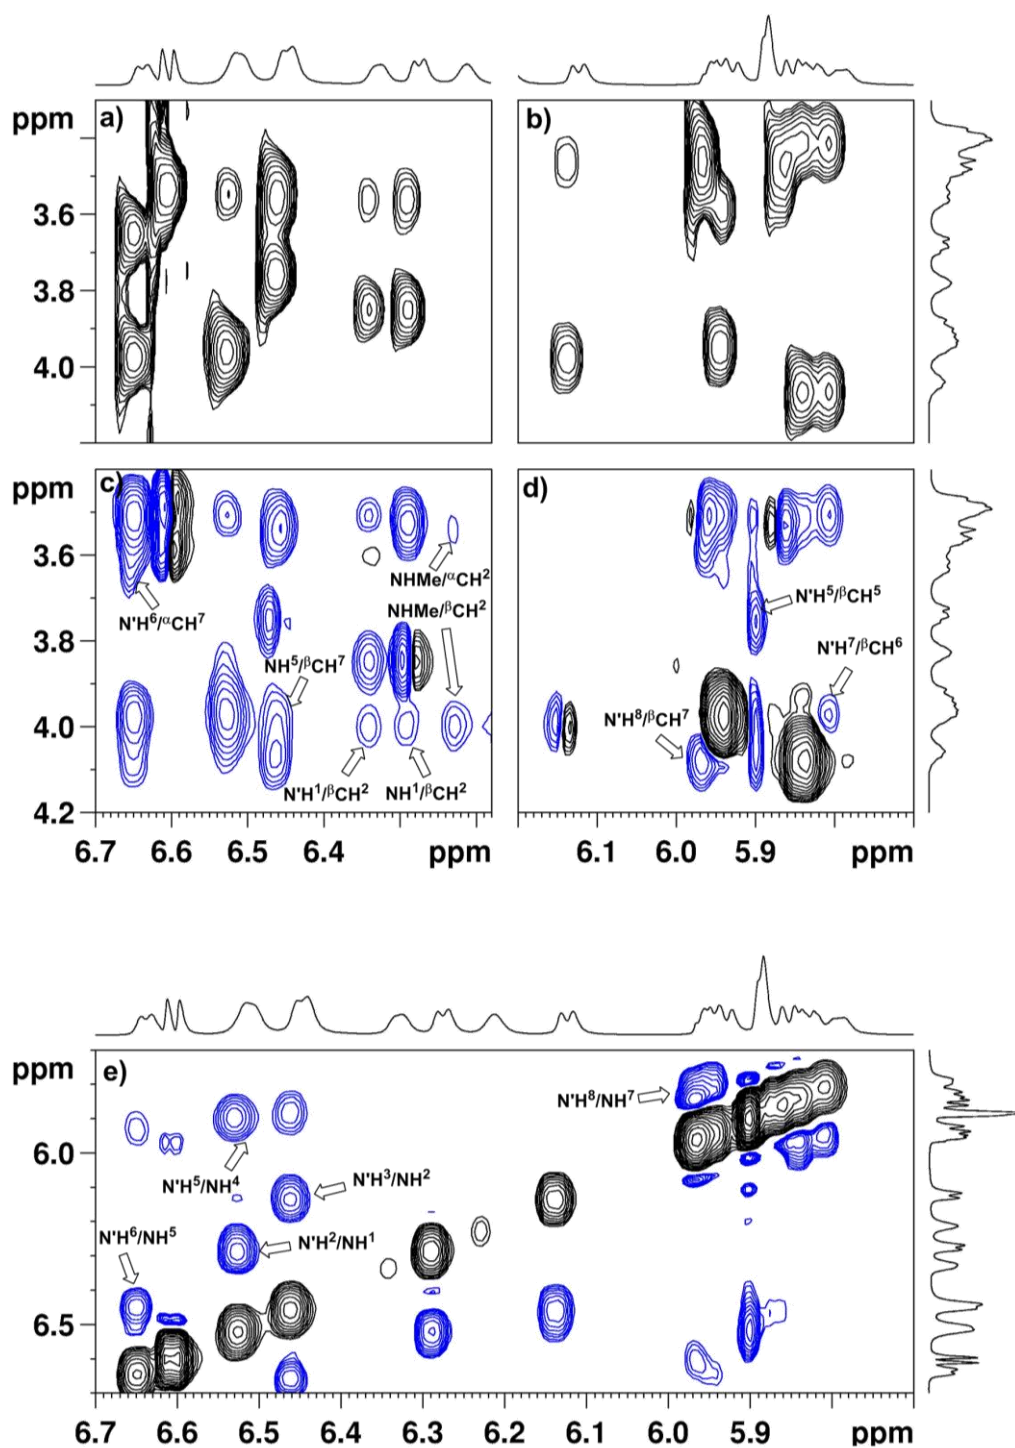

**Figure S14:** Representative sets of NOe connectivities observed for **5** in CD<sub>3</sub>OH (700MHz). a) and b) part of the TOCSY plot shown for comparison c) and d) Part of the NH/CH region of the ROESY e) Part of the NH/NH region of the ROESY plot of **5**.

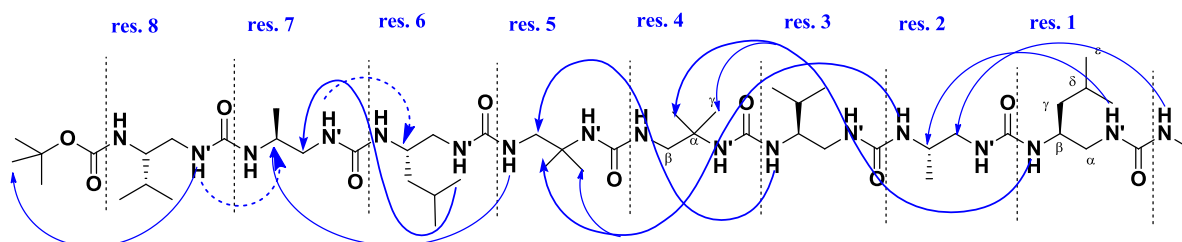

**Scheme S12:** NOE connectivities observed for **5** in CD<sub>3</sub>OH. N'H(i+1)/β'CH(i) represented in dashed arrows have been attributed previously as Z-E isomerization<sup>7</sup>

**Table S5:** <sup>1</sup>H NMR chemical shifts (in ppm) of **6** in CD<sub>3</sub>OH (600 MHz)

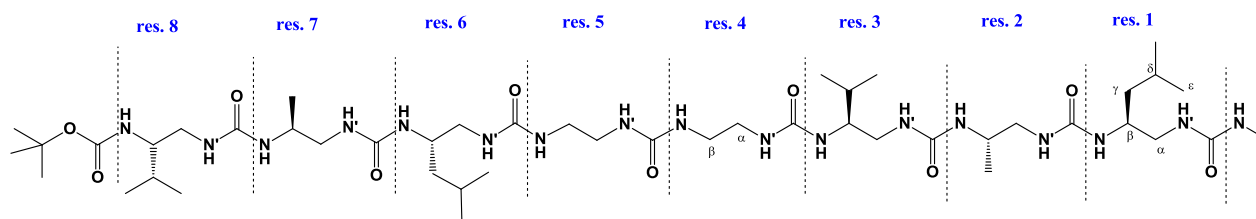

| Residue             | N'H  | NH   | $\alpha'$ CH <sup>1</sup> | $\alpha'$ CH <sup>2</sup> | $\beta'$ CH | $\gamma'$ CH | $\delta'$ CH | $\epsilon'$ CH | term CH |
|---------------------|------|------|---------------------------|---------------------------|-------------|--------------|--------------|----------------|---------|
| NH-Me               |      | 6.23 |                           |                           |             |              |              |                | 2.72    |
| Leu <sup>u</sup> U1 | 6.44 | 6.05 | 3.57                      | 2.68                      | 3.89        | 1.70         | 1.24         | 0.93           |         |
| Ala <sup>u</sup> U2 | 6.45 | 6.10 | 3.55                      | 2.40                      | 4.03        | 1.04         |              |                |         |
| Val <sup>u</sup> U3 | 6.41 | 6.26 | 3.63                      | 2.50                      | 3.63        | 1.59         | 0.90         |                |         |
| Gly <sup>u</sup> U4 | 6.51 | 6.13 | 3.62                      | 2.81                      | 3.69        | 2.71         |              |                |         |
| Gly <sup>u</sup> U5 | 6.66 | 6.22 | 3.64                      | 2.84                      | 3.65        | 2.68         |              |                |         |
| Leu <sup>u</sup> U6 | 6.68 | 5.98 | 3.65                      | 2.38                      | 3.98        | 1.72         | 1.22         | 0.93           |         |
| Ala <sup>u</sup> U7 | 5.82 | 5.90 | 3.61                      | 2.35                      | 3.92        | 1.06         |              |                |         |
| Val <sup>u</sup> U8 | 6.02 | 6.65 | 3.51                      | 2.57                      | 3.63        | 1.65         | 0.95         |                |         |
| Boc                 |      |      |                           |                           |             |              |              |                | 1.48    |

**Table S6:** <sup>1</sup>H NMR anisochronicity ( $\Delta\delta$ ) values for main chain methylene protons in compounds **1**, **2** and **3**

| Compound | P7   | P6   | P5   | P4   | P3   | P2   | P1   |
|----------|------|------|------|------|------|------|------|
| <b>1</b> | 0,94 | 1,16 | 1,24 | 1,37 | 1,22 | 1,21 | 0,96 |
| <b>2</b> | 0,92 | 1,11 | 1,07 | 0,49 | 1,29 | 1,25 | 0,91 |
| <b>3</b> | 0,95 | 1,19 | 1,10 | 1,41 | 1,16 | 1,21 | 0,92 |

<sup>7</sup> A. Violette, M. C. Averlant-Petit, V. Semetey, C. Hemmerlin, R. Casimir, R. Graff, M. Marraud, J.-P. Briand, D. Rognan, G. Guichard, *JACS*, **2005**, *127*, 2156-2164.

**Table S7:**  $^1\text{H}$  NMR anisochronicity ( $\Delta\delta$ ) values for main chain methylene protons in compounds **4**, **5** and **6**.

| <b>Compound</b> | <b>P8</b> | <b>P7</b> | <b>P6</b> | <b>P5</b> | <b>P4</b> | <b>P3</b> | <b>P2</b> | <b>P1</b> |
|-----------------|-----------|-----------|-----------|-----------|-----------|-----------|-----------|-----------|
| <b>4</b>        | 0,89      | 1,08      | 0,89      | 0,42      | 0,23      | 1,31      | 1,29      | 0,92      |
| <b>5</b>        | 0,84      | 1,10      | 1,05      | 1,33      | 0,90      | 1,11      | 1,16      | 0,95      |
| <b>6</b>        | 0,94      | 1,26      | 1,27      | 0.97-0.80 | 0.98-0.81 | 1,13      | 1,15      | 0,89      |



## Circular dichroism (CD) measurements

All Circular dichroism (CD) spectra were recorded on a J-815 Jasco dichrographe (Jasco France, Nantes, France).

Spectra were acquired between 300 and 180 nm at a concentration of 0.2 mM in 2,2,2-trifluoroethanol (NMR grade,  $\geq 99.5\%$ ) using a quartz cell with a path length of 1 mm (Hellma 110-QS 1mm, Paris, France).

Sample temperature was regulated at 20°C. Data were collected in continuous scan mode with a data pitch of 0.1 nm, a scanning speed of 50 nm.min<sup>-1</sup>, 2 nm bandwidth and 2 accumulations per sample. Sample Data were collected as raw ellipticity ( $\psi$  in mdeg) and converted to mean residue ellipticity (MRE or  $[\theta]$ ) in deg.cm<sup>2</sup>.dmol<sup>-1</sup>.residue<sup>-1</sup> using the following equation:

$$[\theta] = \frac{\psi \times 10^{-3}}{res \times l \times c}$$

Where *res* is the number of residues in the oligomer, *l* is the pathlength in cm, and *c* is the Oligourea concentration in dmol.cm<sup>-3</sup>.

## X-Ray diffraction studies

Data collections were performed at the IECB X-ray facility at room temperature on rotating anode sources. Crystal structures of compounds **2** and **3** were solved from data collected on a Rigaku micromax MM07 equipped with a partial chi goniometer and a detector IP RAPID. The data for the crystal structure of compound **5** were collected on a Bruker microstar X8 PROTEUM with a classical kappa geometry and Platinum135 CCD camera. All the statistics are compiled in table S7. All structures were solved by the ab-initio method implemented in SHELXD and refined with SHELXL (Sheldrick, G.M. Acta Cryst. A64, 2008, 112-122). Full-matrix least-squares refinement was performed on  $F^2$  for all unique reflections, minimizing  $w(F_o^2 - F_c^2)^2$ , with anisotropic displacement parameters for non-hydrogen atoms. The positions of the H atoms were deduced from coordinates of the non-H atoms. The non-H atoms were refined with anisotropic temperature parameters. H atoms were included for structure factor calculations but not refined

CCDC 922576 (**2**), CCDC 922577 (**3**) and CCDC 922578 (**5**) contain the supplementary crystallographic data for this paper. These data can be obtained free of charge from The Cambridge Crystallographic Data Centre via [www.ccdc.cam.ac.uk/data\\_request/cif](http://www.ccdc.cam.ac.uk/data_request/cif).

**Table S8:** Crystallographic data for compounds **2**, **3** and **5**

| <b>Compound</b>                            | <b>2</b>                        | <b>3</b>         | <b>5</b>               |
|--------------------------------------------|---------------------------------|------------------|------------------------|
| <b>CCDC code</b>                           |                                 |                  |                        |
| <b>Formula</b>                             | C23.50 H48.50<br>N7.50 O5 S0.50 | C90 H183 N30 O19 | C25 H50.50 N8.50<br>O6 |
| <b>M</b>                                   | 532.23                          | 1989.66          | 566.24                 |
| <b>Crystal system</b>                      | triclinic                       | monoclinic       | monoclinic             |
| <b>Space group</b>                         | P1                              | P2(1)            | P2(1)                  |
| <b><i>a</i>/Å</b>                          | 9.866(2)                        | 14.2758(7)       | 10.658(2)              |
| <b><i>b</i>/Å</b>                          | 10.472(2)                       | 10.5020(7)       | 18.807(4)              |
| <b><i>c</i>/Å</b>                          | 16.893(3)                       | 39.927(3)        | 17.672(4)              |
| <b><i>α</i>/°</b>                          | 96.60(3)                        | 90.00            | 90.00                  |
| <b><i>β</i>/°</b>                          | 95.35(3)                        | 90.983(6)        | 106.39(3)              |
| <b><i>γ</i>/°</b>                          | 113.94(3)                       | 90.00            | 90.00                  |
| <b><i>V</i>/Å<sup>3</sup></b>              | 1565.7(5)                       | 5985.1(6)        | 3398.2(12)             |
| <b>T /K</b>                                | 293(2)                          | 293(2)           | 293(2)                 |
| <b>Z</b>                                   | 2                               | 2                | 4                      |
| <b><math>\rho</math>/g cm<sup>-3</sup></b> | 1.129                           | 1.104            | 1.107                  |
| <b>size (mm)</b>                           | 0.2x 0.02x 0.01                 | 0.05x 0.05x 0.01 | 0.1x0.02x0.01          |
| <b><math>\lambda</math> / Å</b>            | 1.54178                         | 1.54178          | 1.54178                |
| <b><math>\mu</math>/mm<sup>-1</sup></b>    | 0.951                           | 0.641            | 0.656                  |
| <b>Independent reflections</b>             | 8949                            | 9534             | 5521                   |
| <b>measured reflections</b>                | 18961                           | 56320            | 13718                  |
| <b>parameters/restraints</b>               | 677/3                           | 1284/1           | 708/4                  |
| <b><i>R</i>1, <i>wR</i>2</b>               | 0.1196/ 0.3192                  | 0.0459/ 0.0833   | 0.0676/0.1834          |
| <b>goodness of fit</b>                     | 1.113                           | 0.874            | 1.072                  |
